# Supplementary material for: Health Services Availability and Readiness Assessment in Sudan: A Comprehensive Evaluation of Health Facilities and System Preparedness in Four States
Source: Research Square preprint supplement (doi:10.21203/rs.3.rs-7818252/v1), 2025-11-26
Supplement: Supplementary file 1 [file BN SARA Tool for Sudan Cleaned.xlsx]

## Sheet: SARA 
				1	2	3	4	5	6	7	8	9	10	11	12	13	14	15	16	17
			Donor /Project	WHALES							UNICEF
	Department	Item	reqiurement on site	Bulang PHC	Bakoryf PHC	Ellyas PHC	Al-Silak PHU	Ulu PHC	Ahmer Siedak	Kurmuk Hospital	Karn Karn	Jurut east	Musfa	Banat	Alnorania	Magaga	Abushanina	Abualnazeer	Hilat Alahjer	Abuzor	Average
	Waiting shelter	Plastic table	2	0	1	0	2	2	1	1	2	2	0	1	0	0	0	0	0	1	0.764706
		Office chair	2	0	0	0	2	2	2	2	2	2	2	1	1	1	1	1	1	1	1.23529
		Plastic mates	5	0	2	2	0	0	0	0	1	1	1	0	0	0	0	0	0	0	0.411765
		Plastic chairs	20	2	3	0	18	20	6	8	6	6	3	3	2	2	2	2	2	2	5.11765
		Patient benches	10	2	3	2	6	8	2	3	3	3	1	1	1	1	1	0	1	1	2.29412
		Water collar	1	0	0	0	1	1	1	1	1	1	0	0	0	0	0	0	0	0	0.352941
		Water cups	4	0	1	1	4	4	1	4	2	1	1	1	1	1	1	1	1	1	1.52941
		Board for advertisement	1	0	0	0	0	0	0	0	0	0	0	0	0	0	0	0	0	0	0
		Timer	1	0	0	0	0	0	0	0	1	1	0	1	0	0	0	0	0	0	0.176471
		Thermometer	1	0	0	0	0	0	0	0	0		0	0	0	0	0	0	0	0	0
		Weight scale	1	1	1	0	1	1	0	1	1	1	0	0	0	0	0	0	0	0	0.411765
		MUAC tape	2	1	2	1	2	2	1	2	0	1	0	0	0	0	0	0	0	0	0.705882
		Manuals for health education	2	1	1	1	1	1	1	1	1	1	0	0	0	0	0	0	0	0	0.529412
		Dust bin different size and color	3	1	2	3	3	3	2	3	2	2	1	1	1	1	1	1	1	1	1.70588
		File box	1	0	0	0	0	0	0	0	1	1	0	0	0	0	0	0	0	0	0.117647
		Water tank	1	1	1	0	1	1	1	1	1	1	0	0	0	0	0	0	0	0	0.470588
		HMIS Tools	1	1	1	1	1	1	1	1	1	1	1	1	1	1	1	1	1	1	1
		Sign board	1	0	0	0	0	0	0	0	1	1	0	1	0	0	0	0	1	1	0.294118
	Department Average																				0	17.1176	29.013
	Medical assistant	Office table	1	1	1	1	1	1	1	1	1	1	1	1	1	1	1	1	1	1	1
		Office chair	1	1	1	1	1	1	1	1	1	1	1	1	1	1	1	1	1	1	1
		Patient chair	2	1	1	1	2	2	1	2	1	1	1	1	1	1	1	1	1	1	1.17647
		Cupboard	1	0	1	1	1	1	1	1	0	0	0	0	0	0	0	0	0	0	0.352941
		Sphygmomanometer	1	1	1	1	1	1	1	1	1	1	1	0	0	0	0	0	0	0	0.588235
		Stethoscope	1	1	1	1	1	1	1	1	1	1	1	1	1	1	1	1	1	1	1
		Thermometer	1	1	1	1	0	0	1	1	1	1	1	1	0	0	0	0	1	1	0.647059
		Respiratory timer	1	1	1	1	1	1	1	1	1	1	1	1	0	0	0	0	1	1	0.764706
		Screen	1	1	1	1	1	1	1	1	1	1	0	0	0	0	0	0	1	1	0.647059
		Examination bed	1	1	1	1	1	1	1	1	1	1	0	0	0	0	0	0	1	1	0.647059
		Hand washing facility	1	0	0	1	1	1	0	1	1	1	0	1	0	0	0	0	1	1	0.529412
		Towels	2	0	0	0	2	2	1	2	0	0	0	0	0	0	0	0	0	0	0.411765
		Gloves (Box)	1	1	1	1	1	1	1	1	1	1	1	1	1	1	1	1	1	1	1
		Soap	1	0	1	1	1	1	1	1	1	1	0	0	0	0	0	0	0	0	0.470588
		Torch	1	0	0	0	0	0	0	1	0	1	0	0	0	0	0	0	0	0	0.117647
		Lab coat	2	0	1	1	2	2	1	1	1	1	0	0	0	0	0	0	1	1	0.705882
		Tongue depressor (Box)	1	1	1	1	1	1	1	1	0	0	0	0	0	0	0	0	0	0	0.411765
		Scale	1	0	1	1	1	1	1	1	1	1	0	0	0	0	0	0	0	0	0.470588
		Treatment protocols	1	0	1	1	0	0	0	1	1	1	0	0	0	0	0	0	0	0	0.294118
		File box	1	0	0	0	0	0	0	0	0	0	0	0	0	0	0	0	0	0	0
		IEC Materials	1	1	1	1	1	1	1	1	1	1	1	1	1	1	1	1	1	1	1
		HMIS Tools	1	1	1	1	1	1	1	1	1	1	1	1	1	1	1	1	1	1	1
		Prescription paper	1	1	1	1	1	1	1	1	0	0	0	0	0	0	0	0	0	0	0.411765
		Office table	1	1	1	1	1	1	1	1	1	1	1	1	0	1	1	1	1	1	0.941176
	Department Average																					15.5882	57.7342
	Midwife	Midwife protocols	1	0	0	0	0	0	0	1	0	0	0	0	0	0	0	0	0	0	0.0588235
		Office chair	1	1	1	1	1	1	1	1	1	1	0	1	1	1	1	1	1	0	0.882353
		Examination bed	1	1	1	1	1	1	1	2	1	1	0	0	0	0	0	0	0	0	0.588235
		Screen	2	0	1	1	2	2	1	2	1	1	0	0	0	0	0	0	0	0	0.647059
		Delivery bed	1	1	1	1	1	1	1	1	1	1	0	0	0	0	0	0	0	0	0.529412
		Delivery set	1	0	1	1	1	1	1	1	1	1	1	1	1	1	1	1	1	1	0.941176
		Trolley	1	0	0	1	1	1	0	1	1	1	0	0	0	1	0	0	1	1	0.529412
		Ambo bag	1	1	1	0	1	1	0	1	0	0	0	0	0	0	0	0	0	0	0.294118
		Patient bed	2	1	0	1	2	2	1	2	1	1	0	0	0	0	0	0	1	1	0.764706
		Mattresses	2	1	0	1	2	2	1	2	1	1	0	0	0	0	0	0	0	0	0.647059
		Bed sheets	2	1	0	1	2	2	1	2	1	1	0	0	0	0	0	0	0	0	0.647059
		Cupboard	1	1	1	1	1	1	1	1	0	0	0	0	0	0	0	0	0	0	0.411765
		Drip stand	2	1	0	1	2	2	1	2	1	1	0	0	0	0	0	0	0	0	0.647059
		Kidney dish	2	1	1	0	2	2	1	2	1	1	1	0	0	0	0	0	0	0	0.705882
		Urine basin	2	1	1	1	2	2	1	2	1	1	0	0	0	0	0	0	1	1	0.823529
		Plastic basin	3	1	1	1	3	3	1	3	1	1	0	0	0	0	0	0	1	1	1
		Plastic buckets	6	1	1	1	6	6	1	6	1	1	1	1	1	1	1	1	1	1	1.88235
		Plastic sheets	2	2	2	2	2	2	2	2	1	1	1	1	1	1	1	1	1	1	1.41176
		Hand washing facility	1	0	0	0	1	1	0	1	1	1	0	0	0	0	0	0	0	0	0.294118
		Clean delivery kits	1	1	1	1	1	1	1	1	0	0	0	0	0	0	0	0	0	0	0.411765
		Lab coat	2	1	1	1	2	2	1	1	0	0	0	0	0	0	0	0	0	0	0.529412
		Gloves (Box)	1	1	1	1	1	1	1	1	1	1	1	1	1	1	1	1	1	1	1
		Chlorhexidine	2	2	2	2	2	2	2	2	1	1	1	1	1	1	1	1	1	1	1.41176
		Iodine	5	5	5	5	5	5	5	5	0	0	0	0	0	0	0	0	0	0	2.05882
		Spirit	2	2	2	2	2	2	2	2	0	0	0	0	0	0	0	0	0	0	0.823529
		Fefol	1	1	1	1	1	1	1	1	1	1	1	1	1	1	1	1	1	1	1
		Folic acid	1	1	1	1	1	1	1	1	1	1	1	0	0	0	0	0	0	0	0.588235
		ANC cards	1		0	0	0	0	0	0	0	0	0	0	0	0	0	0	0	0	0
		Catgut suture	12	3	3	6	12	12	8	12	1	1	1	1	1	1	1	1	1	1	3.88235
		Sterile gauze	1	1	1	1	1	1	1	1	1	1	1	1	1	1	1	1	1	1	1
		Cotton wool	10	10	10	10	10	10	10	10	1	1	1	1	1	1	1	1	1	1	4.70588
		Sphygmomanometer	1	0	0	0	1	1	0	1	1	1	1	1	1	1	1	1	1	1	0.764706
		Stethoscope	1	0	0	0	1	1	0	1	1	1	1	1	1	1	1	1	1	1	0.764706
		Fetoscope	1	1	1	1	1	1	1	1	1	1	1	1	1	1	1	1	1	1	1
		Baby scale	1	0	1	1	1	1	1	1	1	1	0	0	0	0	0	0	0	0	0.470588
		Baby bed	1	0	0	0	1	1	0	1	0	0	0	0	0	0	0	0	0	0	0.176471
		Patient chair	2	0	1	1	2	2	1	2	1	1	1	1	0	0	0	0	1	1	0.882353
		Soap	1	1	1	1	1	1	1	1	1	1	1	1	1	1	1	1	1	1	1
		Cazerameel	2	0	1	1	2	2	1	2	0	0	0	0	0	0	0	0	0	0	0.529412
		Urine catheter	5	0	0	2	5	5	1	2	1	1	1	1	1	1	1	1	1	1	1.47059
		Urinary metallic catheter	2	0	0	0	2	2	1	0	0	0	0	0	0	0	0	0	0	0	0.294118
		Canula	10	10	10	10	10	10	10	10	1	1	1	1	1	1	1	1	1	1	4.70588
		Lidocaine	5	5	5	5	5	5	5	5	5	5	5	5	5	5	5	5	5	5	5
		Adult scale	1	1	1	1	1	1	1	1	1	1	0	0	0	0	0	0	1	1	0.647059
		Towels	2	0	1	1	2	2	1	2	0	0	0	0	0	0	0	0	0	0	0.529412
		Mosquito nets	1	1	1	1	1	1	1	1	0	0	0	0	0	0	0	0	0	0	0.411765
		Sucker	1	0	0	0	1	1	0	1	0	0	0	0	0	0	0	0	0	0	0.176471
		Safety box	2	2	2	2	2	2	2	2	1	1	1	1	1	1	1	1	1	1	1.41176
		File box	2	0	0	0	0	0	0	0	0	0	0	0	0	0	0	0	0	0	0
		HMIS Tools	1	1	1	1	1	1	1	1	0	0	0	0	0	0	0	0	0	0	0.411765
		IEC materials protocols	1	1	1	1	1	1	1	1	1	1	0	0	0	0	0	0	0	0	0.529412
		Dust bin	2	1	1	1	2	2	1	2	1	1	0	0	0	0	0	0	1	1	0.823529
	Department Average																					53.1176	45.015
	Nursing room	Autoclave	1	1	1	1	1	1	1	1	1	1	0	0	0	0	0	0	0	0	0.529412
		Stove	1	0	0	0	1	1	0	0	0	0	0	0	0	0	0	0	0	0	0.117647
		Gas cylinder	1	0	0	0	1	1	0	0	0	0	0	0	0	0	0	0	0	0	0.117647
		Cupboard	1	1	0	1	1	1	1	1	1	1	0	0	0	0	0	0	0	0	0.470588
		Patient bed	4	3	2	2	4	4	2	4	1	1	0	1	0	0	0	0	1	1	1.52941
		Drip stand	2	2	2	2	2	2	1	2	1	1	0	0	0	0	0	0	0	0	0.882353
		Plastic table	1	0	1	1	1	1	1	1	1	1	0	1	0	0	0	0	1	1	0.647059
		Plastic chair	3	1	1	1	3	3	1	3	2	2	0	0	0	0	0	0	2	2	1.23529
		Dressing set	2	1	1	1	2	2	1	2	1	1	1	1	1	1	1	1	1	1	1.17647
		Cazerameel	2	1	1	1	2	2	1	2	0	0	0	0	0	0	0	0	0	0	0.588235
		Lidocaine	5	5	5	5	5	5	5	5	5	5	5	5	5	5	5	5	5	5	5
		Lab coat	2	1	1	2	2	2	1	0	1	1	0	0	0	0	0	0	0	0	0.647059
		Gloves	1	1	1	1	1	1	1	1	1	1	1	1	1	1	1	1	1	1	1
		Chlorhexidine	3	3	3	3	3	3	3	3	1	1	1	1	1	1	1	1	1	1	1.82353
		Iodine	5	5	5	5	5	5	5	5	1	1	1	1	1	1	1	1	1	1	2.64706
		Spirit	2	2	2	2	2	2	2	2	1	1	1	1	1	1	1	1	1	1	1.41176
		Catgut suture	12	6	3	12	12	12	12	12	1	1	1	1	1	1	1	1	1	1	4.64706
		Mattresses	4	3	2	2	4	4	2	4	1	1	1	0	0	0	0	0	1	1	1.52941
		Bed sheets	4	0	2	2	4	4	2	4	1	1	1	0	0	0	0	0	1	1	1.35294
		Gauze roll	1	1	1	1	1	1	1	1	1	1	1	1	1	1	1	1	1	1	1
		Gauze bandage	10	10	10	10	10	10	10	10	1	1	1	1	1	1	1	1	1	1	4.70588
		Crept bandage	10	10	10	10	10	10	10	10	1	1	1	0	0	0	0	0	0	0	4.29412
		Urine catheter	10	0	0	0	10	10	0	3	0	0	0	0	0	0	0	0	0	0	1.35294
		Urinary bag	10	0	0	0	10	10	0	3	0	0	0	0	0	0	0	0	0	0	1.35294
		Canula	10	10	8	10	10	10	10	10	10	10	10	10	10	10	10	10	10	10	9.88235
		Safety box	2	2	2	2	2	2	2	2	1	1	1	1	1	1	1	1	1	1	1.41176
		File box	2	0	0	0	2	2	0	0	0	0	0	0	0	0	0	0	0	0	0.235294
		HMIS Tools	1	0	1	1	1	1	1	1	0	0	0	0	0	0	0	0	0	0	0.352941
		Dust bin	3	1	1	1	3	3	1	2	2	2	2	0	0	0	0	0	0	0	1.05882
	Department Average																					53	46.087
	Lab Department	Microscope	1	1	1	1	1	1	1	1	1	1	1	0	0	0	0	0	0	0	0.588235
		Colorimeter	1	1	1	1	1	1	1	1	0	0	0	0	0	0	0	0	0	0	0.411765
		Chair	1	1	1	1	1	1	1	1	1	1	1	1	1	1	1	1	1	1	1
		Lab table	2	1	1	1	2	2	1	2	1	1	0	0	0	0	0	0	0	0	0.705882
		Cupboard	1	1	0	1	1	1	1	1	0	0	0	0	0	0	0	0	0	0	0.352941
		Power	1	1	0	1	1	1	1	1	1	1	0	0	0	0	0	0	0	0	0.470588
		Hand washing facility	1	0	0	0	1	1	0	1	1	1	0	0	0	0	0	0	0	0	0.294118
		Electronic centrifuge	1	1	1	1	1	1	1	1	0	0	0	0	0	0	0	0	0	0	0.411765
		Gluco-meter	1	0	0	0	1	1	0	0	0	0	0	0	0	0	0	0	0	0	0.117647
		Haemometer	2	0	0	1	2	2	1	0	0	0	0	0	0	0	0	0	0	0	0.352941
		Blood container (EDTA)	1	1	1	1	1	1	1	1	0	0	0	0	0	0	0	0	0	0	0.411765
		Blood lancet	1	1	1	1	1	1	1	1	1	1	1	1	1	1	1	1	1	1	1
		ESR RACKS	1	1	1	1	1	1	1	1	0	0	0	0	0	0	0	0	0	0	0.411765
		ESR tubes	12	12	6	1	12	12	12	12	0	0	0	0	0	0	0	0	0	0	3.94118
		Urine container	1	1	1	1	1	1	1	1	0	0	0	0	0	0	0	0	0	0	0.411765
		Stool container	1	1	1	1	1	1	1	1	0	0	0	0	0	0	0	0	0	0	0.411765
		Urine strips	1	1	1	1	1	1	1	1	0	0	0	0	0	0	0	0	0	0	0.411765
		HCG test strip	1	1	1	1	1	1	1	1	1	1	1	1	1	1	1	1	1	1	1
		Rapid test VDRL	1	0	0	0	0	0	0	0	0	0	0	0	0	0	0	0	0	0	0
		Rapid test Malaria	1	1	1	1	1	1	1	1	1	1	1	1	1	1	1	1	1	1	1
		Test tubes	12	12	12	12	12	12	12	12	0	0	0	0	0	0	0	0	0	0	4.94118
		Slides	1	1	1	1	1	1	1	1	0	0	0	0	0	0	0	0	0	0	0.411765
		Cover glass	1	1	1	1	1	1	1	1	0	0	0	0	0	0	0	0	0	0	0.411765
		Oil emersion	1	1	1	1	1	1	1	1	0	0	0	0	0	0	0	0	0	0	0.411765
		HCL solution	1	1	0	1	1	1	1	1	0	0	0	0	0	0	0	0	0	0	0.352941
		Tube racks	2	2	2	2	2	2	2	2	0	0	0	0	0	0	0	0	0	0	0.823529
		Patient chair	2	0	1	2	2	2	2	2	1	1	1	1	1	1	1	1	1	1	1.23529
		Lab coat	2	1	0	1	2	2	1	0	1	1	1	0	0	0	0	0	0	0	0.588235
		WBC chamber	2	2	1	2	2	2	2	2	0	0	0	0	0	0	0	0	0	0	0.764706
		Automatic pipette	2	1	0	2	2	2	1	1	0	0	0	0	0	0	0	0	0	0	0.529412
		Safety box	2	2	2	2	2	2	2	2	0	0	0	0	0	0	0	0	0	0	0.823529
		HMIS Tools	1	1	1	1	1	1	1	1	0	0	0	0	0	0	0	0	0	0	0.411765
		File box	2	0	0	1	2	2	0	0	0	0	0	0	0	0	0	0	0	0	0.294118
		Dust bin	2	1	1	2	2	2	2	1	0	0	0	0	0	0	0	0	0	0	0.647059
	Department Average																					26.3529	39.9287
	Pharmacy	Shelves	1	1	1	0	1	1	1	1	1	1	1	0	0	0	0	0	0	0	0.529412
		Cupboard	2	2	2	2	2	2	2	2	1	1	1	1	0	0	0	0	1	1	1.17647
		Office chair	1	1	1	1	1	1	1	1	1	1	1	1	1	1	1	1	1	1	1
		Office table	2	1	1	1	2	2	1	1	1	1	1	1	1	1	1	1	1	1	1.11765
		Box file	3	1	0	0	3	3	0	0	0	0	0	0	0	0	0	0	0	0	0.411765
		Lap coat	2	1	0	0	2	2	1	1	1	1	0	0	0	0	0	0	0	0	0.529412
		Marker pen	12	10	8	12	12	12	10	12	1	1	1	1	1	1	1	1	1	1	5.05882
		Different type of drugs	1	1	1	1	1	1	1	1	1	1	1	1	1	1	1	1	1	1	1
		Drugs bags	1	1	1	1	1	1	1	1	0	0	0	0	0	0	0	0	0	0	0.411765
		Registration form	1	0	1	1	1	1	1	1	1	1	0	0	0	0	0	0	0	0	0.470588
		Tea spoon	1	0	0	0	1	1	1	0	0	0	0	0	0	0	0	0	0	0	0.176471
		HMIS Tools	1	1	1	1	1	1	1	1	0	0	0	0	0	0	0	0	0	0	0.411765
		Labeling of the drugs	1	1	1	1	0	0	1	1	0	0	0	0	0	0	0	0	0	0	0.294118
		Dust bin	1	1	1	1	1	1	1	1	1	1	1	1	1	1	1	1	1	1	1
	Department Average																					13.5882	45.2941
	Vaccination room	Refrigerator	1	0	1	0	0	1	0	1	0	0	0	0	0	0	0	0	0	0	0.176471
		Vaccines	1	0	1	0	0	1	0	1	0	0	0	0	0	0	0	0	0	0	0.176471
		Vaccination syringes	1	0	1	0	0	1	0	1	0	0	0	0	0	0	0	0	0	0	0.176471
		Cold chain boxes	2	0	2	0	0	2	0	2	0	0	0	0	0	0	0	0	0	0	0.352941
		Safety box	2	0	2	0	0	2	0	2	0	0	0	0	0	0	0	0	0	0	0.352941
		Office chair	1	0	1	0	0	0	0	1	1	1	1	0	0	0	0	0	0	0	0.294118
		Patient chair	3	0	2	0	0	3	0	3	1	1	0	0	0	0	0	0	0	0	0.588235
		Office table	1	0	1	0	0	0	0	1	1	1	0	0	0	0	0	0	0	0	0.235294
		Cupboard	1	0	1	0	0	1	0	1	0	0	0	0	0	0	0	0	0	0	0.176471
		File box	3	0	2	0	0	0	0	3	0	0	0	0	0	0	0	0	0	0	0.294118
		Sprit	2	0	2	0	0	0	0	1	0	0	0	0	0	0	0	0	0	0	0.176471
		Cotton	10	0	5	0	0	10	0	10	0	0	0	0	0	0	0	0	0	0	1.47059
		Child Health cards	1	0	0	0	0	0	0	0	0	0	0	0	0	0	0	0	0	0	0
		HMIS Tools	1	0	1	0	1	1	1	1	0	0	0	0	0	0	0	0	0	0	0.294118
		Dust bin	2	0	1	0	0	0	0	2	0	0	0	0	0	0	0	0	0	0	0.176471
		IEC Materials	1	0	1	0	1	1	1	1	0	0	0	0	0	0	0	0	0	0	0.294118
	Department Average																					5.23529	9.51872
	Community Health initiatives	CHWs	8	4	3	5	1	0	5	6	5	5	0	0	0	0	0	0	0	0	2
		Lead Mothers	4	3	4	0	0	3	0	4	0	0	0	0	0	0	0	0	0	0	0.823529
		Mother Care Groups	4	7	4	0	0	5	0	5	0	0	0	0	0	0	0	0	0	0	1.23529
		CHW teaching aid	8	7	5	0	1	5	0	4	0	0	0	0	0	0	0	0	0	0	1.29412
		CHW referal booklet	8	0	0	0	0	0	0	0	0	0	0	0	0	0	0	0	0	0	0
		CHW reporting book	8	0	0	0	0	0	0	0	0	0	0	0	0	0	0	0	0	0	0
		Lead Mother Job aid	4	0	0	0	0	0	0	0	0	0	0	0	0	0	0	0	0	0	0
		Lead Mother referal booklet	4	0	0	0	0	0	0	0	0	0	0	0	0	0	0	0	0	0	0
		Lead Mother reporting book	4	0	0	0	0	0	0	0	0	0	0	0	0	0	0	0	0	0	0
		HF outreach plan	1	1	1	1	1	1	1	1	0	0	0	0	0	0	0	0	0	0	0.411765
		HF catchment area	1	4	4	4	5	5	5	6	0	0	0	0	0	0	0	0	0	0	1.94118
		Community Midwives	4	4	4	4	3	2	2	4	4	4	0	4	0	0	0	4	4	4	2.76471
		Community Midwives repports	4	0	0	0	0	0	0	0	0	0	0	0	0	0	0	0	0	0	0
	Department Average																					10.4706	16.888
	Nutrition Services	Thermometers	4	1	1	1	1	1	1	1	0	0	0	0	0	0	0	0	0	0	0.411765
		Salter scale (25 kg) (plus pants or plastic basin) or mother & child Electronic	1	1	1	1	1	0	1	1	1	1	0	0	0	0	0		1	1	0.588235
		scale	1	1	1	1	1	1	1	0	1	0	0	0	0	0	0	0	1	1	0.529412
		Height/Length board	3	1	1	1	0	0	1	1	1	1	0	0	0	0	0	0	1	0	0.470588
		MUAC tapes (child)	1	5	1	1	0	0	1	1	1	1	0	0	0	0	0	0	0	0	0.647059
		MUAC tapes (mother)	1	3	1	0	0	3	0	4	0	0	0	0	0	0	0	0	0	0	0.647059
		Plastic matts (# 3) or Benches (# 6) in mothers waiting area	1	1	1	1	1	1	1	1	0	0	0	0	0	0	0	0	0	0	0.411765
		Plastic matts in appetite test place	1	1	1	1	1	1	1	1	1	1	0	0	0	0	0	0	1	1	0.647059
		Water container (# 3)	3	1	1	1	1	1	1	1	1	1	0	0	0	0	0	0	1	1	0.647059
		Cups (# 15)	15	5	6	6	6	1	6	4	1	0	0	0	0	0	0	0	0	0	2.05882
		Sugar	1	0	0	0	0	0	0	0	0	0	0	0	0	0	0	0	0	0	0
		Hand washing facility and water	1	1	1	1	1	1	1	1	1	1	0	0	0	0	0	0	0	1	0.588235
		Amoxicillin	1	1	1	1	0	0	1	1	1	1	0	0	0	0	0	0	1	1	0.529412
		Folic acid	1	1	1	1	1	1	1	1	1	1	0	0	0	0	0	0	1	1	0.647059
		Vit A	1	1	1	1	1	1	1	1	1	1	0	0	0	0	0	0	1	1	0.647059
		Measles vaccine	1	1	1	1	1	1	1	1	0	0	0	0	0	0	0	0	0	0	0.411765
		Mebendazole	1	1	1	1	1	1	1	1	0	0	0	0	0	0	0	0	0	1	0.470588
		Malaria diagnoses kit	1	1	1	1	1	1	1	1	1	1	1	1	1	1	1	1	1	1	1
		Urine analysis tool	1	1	1	1	1	1	1	1	0	0	0	0	0	0	0	0	0	0	0.411765
		Stool analysis tool	1		0	0	0	0	0	0	0	0	0	0	0	0	0	0	0	0	0
		Water	1	0	1	1	0	0	0	1	1	1	0	0	0	0	0	0	1	1	0.411765
		Latrine	1	1	1	1	1	0	1	1	1	1	0	0	0	0	0	0	1	1	0.588235
		Soap	1	1	1	1	1	1	1	1	1	1	1	1	1	1	1	1	1	1	1
		Detergents	1	1	1	1	1	1	1	1	1	1	1	1	1	1	1	1	1	1	1
		Brooms	1	1	1	1	1	1	1	1	1	1	1	1	1	1	1	1	1	1	1
		Garbage /trash basket	1	1	1	1	1	1	1	1	1	1	1	1	1	1	1	1	1	1	1
		Incinerator	1	1	1	1	0	0	1	0	0	0	0	0	0	0	0	0	0	0	0.235294
		Laminated sheet weight for height	1		0	0	0	0	0	0	0	0	0	0	0	0	0	0	0	0	0
		RUTF ration sheet	1	1	0	1	0	0	1	1	0	1	0	0	0	0	0	0	0	0	0.294118
		Stationaries	1	1	0	1	1	1	1	1	0	1	0	0	0	0	0	0	0	0	0.411765
		Child follow-up card (admission)	1	1	0	0	0	0	0	0	0	1	0	0	0	0	0	0	0	0	0.117647
		Child registration book for out patient	1	1	0	1	0	0	1	1	0	1	0	0	0	0	0	0	0	0	0.294118
		Health Education book	1	1	0	1	0	0	1	1	0	1	0	0	0	0	0	0	0	0	0.294118
		Monitoring & supervision book (field monitoring visit)	1	1	0	1	0	0	0	0	0	1	0	0	0	0	0	0	0	0	0.176471
		Referral card (child)	1	1	0	1	0	0	1	1	0	1	0	0	0	0	0	0	0	0	0.294118
		Discharge card (child)	1	1	0	1	0	0	1	1	0	1	0	0	0	0	0	0	0	0	0.294118
		Monthly report form 43	1	1	0	1	0	0	1	1	0	1	0	0	0	0	0	0	0	0	0.294118
		Supply form	1	0	0	0	0	0	0	0	0	1	0	0	0	0	0	0	0	0	0.0588235
		Ration card (RUTF)	1	1	0	1	0	0	1	1	0	1	0	0	0	0	0	0	0	0	0.294118
		Home visit sheets	1	1	0	1	0	0	1	1	0	1	0	0	0	0	0	0	0	0	0.294118
		Map of catchment area	1	0	0	0	0	0	0	0	0	0	0	0	0	0	0	0	0	0	0
		Chart with target and admission per month	1	0	0	0	0	0	0	0	0	0	0	0	0	0	0	0	0	0	0
		Poster of Assessment and Classification of Children 6 to 59 months with Acute malnutrition	1	1	0	1	0	0	1	1	0	1	0	0	0	0	0	0	0	0	0.294118
		Flow up chart for Assessment and Action for children between 6 to 59 months	1	1	0	1	0	0	1	0	0	1	0	0	0	0	0	0	0	0	0.235294
		Basic messages for management of acute malnutrition	1	1	0	1	0	0	0	1	0	1	0	0	0	0	0	0	0	0	0.235294
		Ready to use therapeutic food (RUTF)	1	1	0	1	0	0	1	1	0	1	0	0	0	0	0	0	0	0	0.294118
		Ready to use supplementary food (RUSF)	1	1	0	1	0	0	0	1	0	1	0	0	0	0	0	0	0	0	0.235294
	Department Average																					21.4118	31.0315
	Total Functionality		578	317	313	316	426	457	330	440	170	186	94	91	75	77	76	79	111	112
	Percentage Functionality			54.8443	54.1522	54.6713	73.7024	79.0657	57.0934	76.1246	29.4118	32.1799	16.263	15.7439	12.9758	13.3218	13.1488	13.6678	19.2042	19.3772			37.3499
	Minimuim Recommended Functionality			75	75	75	75	75	75	75	75	75	75	75	75	75	75	75	75	75
	Gap to attian minimum			20.1557	20.8478	20.3287	1.29758	-4.06574	17.9066	-1.12457	45.5882	42.8201	58.737	59.2561	62.0242	61.6782	61.8512	61.3322	55.7958	55.6228

## Sheet: Staffing Norms 
			1	2	3	4	5	6	7
		Donor/Project	OFDA Facilities
		Reqiurements	Bulang PHC(OFDA)	Bakoryf PHC	Ellyas PHC	Al-Silak PHU	Ulu PHC	Ahmer Siedak	Kurmuk Hospital	Average
PHU	Medical Doctor	1	1	1	0	0	0	0	1	0.428571
	Specailist Physicians(Please specify) family medicine specialist	1	0	0	0	0	0	0	0	0
	Medical Assistant	3	1	1	1	1	1		1	0.857143
										0
	Pharmacy assistant	2	1	1	1	0	1	1	1	0.857143
	Midwife	4	4	4	4	1	1	2	4	2.85714
	Health visitors	1	0	0	0	0	0	0	0	0
	EPI technicians	1	1	1	1	1	1	1	1	1
	Nurses	4	1	1	1	1	1	1	1	1
	Lab technician	1	1	1	1	1	1	1	1	1
	Lab Assistant	1	0	0	0	0	0	0	0	0
	Health promoters	1	1	1	1	1	1	1	1	1
	Nutrition assistant	1	1	0	1	0	0	0	0	0.285714
	Community health workers	4	4	4	4	4	4	4	4	4
	Pharmacist	1	0	0	0	0	0	0	0	0
	Radio-technican	1	0	0	0	0	0	0	0	0
	Psychologist	1	0	0	0	0	0	0	0	0
	Dentist	1	0	0	0	0	0	0	0	0
	Dentist technican	1	0	0	0	0	0	0	0	0
	Optimologist	1	0	0	0	0	0	0	0	0
	Storekeeper	1	0	0	0	0	0	0	0	0
	Cleaner	3	1	1	1	1	1	1	1	1
	Volunteer	8	8	0	8	0	0	8	8	4.57143
	Supervisor	1	1	0	1	0	0	1	1	0.571429
										0	19.4286	44.1558
Nutrition Section	Medical Assistant	1	0	0	0	0	0	0	0	0
	Nutritionist	1	0	0	0	0	0	0	0	0
	Nutrition assistant	4	1	0	1	0	0	1	1	0.571429
	Community health workers	1	0	0	0	0	0	0	0	0
	Optimologist	1	0	0	0	0	0	0	0	0
	Storekeeper	1	0	0	0	0	0	0	0	0
	Cleaner	1	0	0	0	0	0	0	0	0
	Volunteer	8	0	0	0	0	0	0	0	0
	Supervisor	1	0	0	0	0	0	0	0	0
											0.571429	3.1746
Total Functionality		63	27	16	26	11	12	22	26
Percentage Functionality			42.8571	25.3968	41.2698	17.4603	19.0476	34.9206	41.2698
Minimuim Recommended Functionality			75	75	75	75	75	75	75
Gap to attian minimum			32.1429	49.6032	33.7302	57.5397	55.9524	40.0794	33.7302
