# Supplementary material for: Health Services Availability and Readiness Assessment in Sudan: A Comprehensive Evaluation of Health Facilities and System Preparedness in Four States
Source: Research Square preprint supplement (doi:10.21203/rs.3.rs-7818252/v1), 2025-11-26
Supplement: Supplementary file 4 [file East Darfur - Cleaned.xlsx]

## Sheet: SARA 
				GFFO PROJECT SITES											UNICEF PROJECT SITES						WHALES PROJECT SITES
	Department	Item	reqiurement on site	Alassal- Elfedous locality	.archivetempkassib-yassin locality	abo gabra locality-algar	Alderiga Adila locality	assalia localitty-monger	baraka_yadin loacality	Dar Elsalam Abo karinka locality	kiak bara bahar alarab locality	rahad bierat sheiria locality	sarhan clinic _Bahar alarab	um Erig Abo gabra locality	Elferdous SSRS clinic	Elnabag baglol	Esheria Clinic	Sania Afando	Shaga Toka	Um Eid clinic	Elgedamia clinic	Gazala Gawazat Clinic	Average
	Waiting shelter	Plastic table	2	0	1	1	1	0	1	1	1	1	1	1	1	1	1	1	0	1	1	1	0.875
		Office chair	2	0	1	1	1	0	1	1	1	1	1	1	2	2	2	2	2	2	2	2	2
		Plastic mates	5	1	1	1	1	1	1	1	1	1	1	1	2	2	2	2	2	2	2	2	2
		Plastic chairs	3	1	1	1	1	1	1	1	1	1	1	1	3	3	3	3	3	3	3	3	3
		Patient benches	10	0	0	0	0	0	0	0	0	0	0	0	3	3	3	3	3	3	3	3	3
		Water collar	1	0	0	0	0	0	0	0	0	0	0	0	1	1	1	1	1	1	1	1	1
		Water cups	4	0	0	0	0	0	0	0	0	0	0	0	2	2	2	2	2	2	2	2	2
		Board for advertisement	1	0	0	0	0	0	0	0	0	0	0	0	0	0	0	0	0	0	0	0	0
		Timer	1	0	0	0	0	0	0	0	0	0	0	0	1	1	1	1	1	1	1	1	1
		Thermometer	1	0	0	0	0	0	0	0	0	0	0	0	1	1	1	1	1	1	1	1	1
		Weight scale	1	0	0	0	0	0	0	0	0	0	0	0	1	1	1	1	1	1	1	1	1
		MUAC tape	2	0	0	0	0	0	0	0	0	0	0	0	2	2	2	2	2	2	2	2	2
		Manuals for health education	2	1	1	1	1	1	1	1	1	1	1	1	2	2	2	2	2	2	2	2	2
		Dust bin different size and color	3	1	1	1	1	1	1	1	1	1	1	1	3	3	3	3	3	3	3	3	3
		File box	1	1	1	1	1	1	1	1	1	1	1	1	1	1	1	1	1	1	1	1	1
		Water tank	1	0	0	0	0	0	0	0	0	0	0	0	1	1	1	1	1	1	1	1	1
		HMIS Tools	1	0	0	0	0	0	0	0	0	0	0	0	1	1	1	1	1	1	1	1	1
		Sign board	1	0	0	0	0	0	0	0	0	0	0	0	1	1	1	1	1	1	1	1	1
																							0	27.875	66.369
	Medical assistant	Office table	1	1	1	1	1	1	1	1	1	1	1	1	1	1	1	1	1	1	1	1	1
		Office chair	1	1	1	1	1	1	1	1	1	1	1	1	1	1	1	1	1	1	1	1	1
		Patient chair	2	1	1	1	1	1	1	1	1	1	1	1	1	1	1	1	1	1	1	1	1
		Cupboard	1	0	0	0	0	0	0	0	0	0	0	0	1	1	1	1	1	1	1	1	1
		Sphygmomanometer	1	1	0	0	0	0	0	0	0	0	0	0	1	1	1	1	1	1	1	1	1
		Stethoscope	1	0	0	0	0	0	0	0	0	0	0	0	1	1	1	1	1	1	1	1	1
		Thermometer	1	0	0	0	0	0	0	0	0	0	0	0	1	1	1	1	1	1	1	1	1
		Respiratory timer	1	0	0	0	0	0	0	0	0	0	0	0	1	1	1	1	1	1	1	1	1
		Screen	1	0	0	0	0	0	0	0	0	0	0	0	1	1	1	1	1	1	1	1	1
		Examination bed	1	0	0	0	0	0	0	0	0	0	0	0	1	1	1	1	1	1	1	1	1
		Hand washing facility	1	0	0	0	0	0	0	0	0	0	0	0	1	1	1	1	1	1	1	1	1
		Towels	2	0	0	0	0	0	0	0	0	0	0	0	2	2	2	2	2	2	2	2	2
		Gloves (Box)	1	1	1	1	1	1	1	1	1	1	1	1	1	1	1	1	1	1	1	1	1
		Soap	1	1	1	1	1	1	1	1	1	1	1	1	1	1	1	1	1	1	1	1	1
		Torch	1	0	0	0	0	0	0	0	0	0	0	0	1	1	1	1	1	1	1	1	1
		Lab coat	2	1	1	1	1	1	1	1	1	1	1	1	2	2	2	2	2	2	2	2	2
		Tongue depressor (Box)	1	0	0	0	0	0	0	0	0	0	0	0	1	1	1	1	1	1	1	1	1
		Scale	1	0	0	0	0	0	0	0	0	0	0	0	1	1	1	1	1	1	1	1	1
		Treatment protocols	1	0	0	0	0	0	0	0	0	0	0	0	1	1	1	1	1	1	1	1	1
		File box	1	0	0	0	0	0	0	0	0	0	0	0	1	1	1	1	1	1	1	1	1
		IEC Materials	1	0	0	0	0	0	0	0	0	0	0	0	1	1	1	1	1	1	1	1	1
		HMIS Tools	1	0	0	0	0	0	0	0	0	0	0	0	1	1	1	1	1	1	1	1	1
		Prescription paper	1	1	1	1	1	1	1	1	1	1	1	1	1	1	1	1	1	1	1	1	1
		Office table	1	0	0	0	0	0	0	0	0	0	0	0	1	1	1	1	1	1	1	1	1
																							0	26	96.2963
	Midwife	Midwife protocols	1	0	0	0	0	0	0	0	0	0	0	0	1	1	1	1	1	1	1	1	1
		Office chair	1	1	1	1	1	1	1	1	1	1	1	1	1	1	1	1	1	1	1	1	1
		Examination bed	1	0	0	0	0	0	0	0	0	0	0	0	1	1	1	1	1	1	1	1	1
		Screen	2	0	0	0	0	0	0	0	0	0	0	0	2	2	2	2	2	2	2	2	2
		Delivery bed	1	0	0	0	0	0	0	0	0	0	0	0	1	1	1	1	1	1	1	1	1
		Delivery set	1	0	0	0	0	0	0	0	0	0	0	0	1	1	1	1	1	1	1	1	1
		Trolley	1	0	0	0	0	0	0	0	0	0	0	0	1	1	1	1	1	1	1	1	1
		Ambo bag	1	0	0	0	0	0	0	0	0	0	0	0	1	1	1	1	1	1	1	1	1
		Patient bed	2	0	0	0	0	0	0	0	0	0	0	0	2	2	2	2	2	2	2	2	2
		Mattresses	2	0	0	0	0	0	0	0	0	0	0	0	2	2	2	2	2	2	2	2	2
		Bed sheets	2	0	0	0	0	0	0	1	0	0	0	0	1	1	1	1	1	1	1	1	1
		Cupboard	1	0	0	0	0	0	0	0	0	0	0	0	1	1	1	1	1	1	1	1	1
		Drip stand	2	0	0	0	0	0	0	0	0	0	0	0	2	2	2	2	2	2	2	2	2
		Kidney dish	2	0	0	0	0	0	0	0	0	0	0	0	2	2	2	2	2	2	2	2	2
		Urine basin	2	0	0	0	0	0	0	0	0	0	0	0	2	2	2	2	2	2	2	2	2
		Plastic basin	3	0	0	0	0	0	0	0	0	0	0	0	3	3	3	3	3	3	3	3	3
		Plastic buckets	6	0	0	0	0	0	0	0	0	0	0	0	6	6	6	6	6	6	6	6	6
		Plastic sheets	2	0	0	0	0	0	0	0	0	0	0	0	2	2	2	2	2	2	2	2	2
		Hand washing facility	1	0	0	0	0	0	0	0	0	0	0	0	1	1	1	1	1	1	1	1	1
		Clean delivery kits	1	0	0	0	0	0	0	0	0	0	0	0	1	1	1	1	1	1	1	1	1
		Lab coat	2	1	1	1	1	1	1	1	1	1	1	1	2	2	2	2	2	2	2	2	2
		Gloves (Box)	1	1	1	1	1	1	1	1	1	1	1	1	1	1	1	1	1	1	1	1	1
		Chlorhexidine	2												2	2	2	2	2	2	2	2	2
		Iodine	5	1	1	1	1	1	1	1	1	1	1	1	2	2	2	2	2	2	2	2	2
		Spirit	2	0	0	0	0	0	0	0	0	0	0	0	2	2	2	2	2	2	2	2	2
		Fefol	1	0	0	0	0	0	0	0	0	0	0	0	1	1	1	1	1	1	1	1	1
		Folic acid	1	0	0	0	0	0	0	0	0	0	0	0	1	1	1	1	1	1	1	1	1
		ANC cards	20																				0
		Catgut suture	12	1	1	1	1	1	1	1	1	1	1	1	10	10	10	10	10	10	10	10	10
		Sterile gauze	1	0	0	0	0	0	0	0	0	0	0	0	1	1	1	1	1	1	1	1	1
		Cotton wool	10	1	1	1	1	1	1	1	1	1	1	1	8	8	8	8	8	8	8	8	8
		Sphygmomanometer	1	0	0	0	0	0	0	0	0	0	0	0	1	1	1	1	1	1	1	1	1
		Stethoscope	1	0	0	0	0	0	0	0	0	0	0	0	1	1	1	1	1	1	1	1	1
		Fetoscope	1	0	0	0	0	0	0	0	0	0	0	0	1	1	1	1	1	1	1	1	1
		Baby scale	1	0	0	0	0	0	0	0	0	0	0	0	1	1	1	1	1	1	1	1	1
		Baby bed	1	0	0	0	0	0	0	0	0	0	0	0	1	1	1	1	1	1	1	1	1
		Patient chair	2	0	0	0	0	0	0	0	0	0	0	0	2	2	2	2	2	2	2	2	2
		Soap	1												1	1	1	1	1	1	1	1	1
		Cazerameel	2	0	0	0	0	0	0	0	0	0	0	0	2	2	2	2	2	2	2	2	2
		Urine catheter	5	0	0	0	0	0	0	0	0	0	0	0	5	5	5	5	5	5	5	5	5
		Urinary metallic catheter	2	0	0	0	0	0	0	0	0	0	0	0	2	2	2	2	2	2	2	2	2
		Canula	10	0	0	0	0	0	0	0	0	0	0	0	10	10	10	10	10	10	10	10	10
		Lidocaine	5												5	5	5	5	5	5	5	5	5
		Adult scale	1	0	0	0	0	0	0	0	0	0	0	0	1	1	1	1	1	1	1	1	1
		Towels	2	0	0	0	0	0	0	0	0	0	0	0	2	2	2	2	2	2	2	2	2
		Mosquito nets	1	0	0	0	0	0	0	0	0	0	0	0	1	1	1	1	1	1	1	1	1
		Sucker	1	0	0	0	0	0	0	0	0	0	0	0	1	1	1	1	1	1	1	1	1
		Safety box	2	0	0	0	0	0	0	0	0	0	0	0	2	2	2	2	2	2	2	2	2
		File box	2	0	0	0	0	0	0	0	0	0	0	0	2	2	2	2	2	2	2	2	2
		HMIS Tools	1	0	0	0	0	0	0	0	0	0	0	0	1	1	1	1	1	1	1	1	1
		IEC materials protocols	1	0	0	0	0	0	0	0	0	0	0	0	1	1	1	1	1	1	1	1	1
		Dust bin	2	0	0	0	0	0	0	0	0	0	0	0	2	2	2	2	2	2	2	2	2
																							0	109	79.562
	Nursing room	Autoclave	1	0	0	0	0	0	0	0	0	0	0	0	1	1	1	1	1	1	1	1	1
		Stove	1	0	0	0	0	0	0	0	0	0	0	0	1	1	1	1	1	1	1	1	1
		Gas cylinder	1	0	0	0	0	0	0	0	0	0	0	0	1	1	1	1	1	1	1	1	1
		Cupboard	1	0	0	0	0	0	0	0	0	0	0	0	1	1	1	1	1	1	1	1	1
		Patient bed	4	0	0	0	0	0	0	0	0	0	0	0	1	1	1	1	1	1	1	1	1
		Drip stand	2	0	0	0	0	0	0	0	0	0	0	0	2	2	2	2	2	2	2	2	2
		Plastic table	1	0	0	0	0	0	0	0	0	0	0	0	1	1	1	1	1	1	1	1	1
		Plastic chair	3	0	0	0	0	0	0	0	0	0	0	0	3	3	3	3	3	3	3	3	3
		Dressing set	2	0	0	0	0	0	0	0	0	0	0	0	2	2	2	2	2	2	2	2	2
		Cazerameel	2	0	0	0	0	0	0	0	0	0	0	0	2	2	2	2	2	2	2	2	2
		Lidocaine	5	0	0	0	0	0	0	0	0	0	0	0	5	5	5	5	5	5	5	5	5
		Lab coat	2	1	1	1	1	1	1	1	1	1	1	1	2	2	2	2	2	2	2	2	2
		Gloves	1	0	0	0	0	0	0	0	0	0	0	0	1	1	1	1	1	1	1	1	1
		Chlorhexidine	3	0	0	0	0	0	0	0	0	0	0	0	3	3	3	3	3	3	3	3	3
		Iodine	5												5	5	5	5	5	5	5	5	5
		Spirit	2	0	0	0	0	0	0	0	0	0	0	0	2	2	2	2	2	2	2	2	2
		Catgut suture	12	0	0	0	0	0	0	0	0	0	0	0	12	12	12	12	12	12	12	12	12
		Mattresses	4												4	4	4	4	4	4	4	4	4
		Bed sheets	4	0	0	0	0	0	0	0	0	0	0	0	4	4	4	4	4	4	4	4	4
		Gauze roll	1	0	0	0	0	0	0	0	0	0	0	0	1	1	1	1	1	1	1	1	1
		Gauze bandage	10	0	0	0	0	0	0	0	0	0	0	0	10	10	10	10	10	10	10	10	10
		Crept bandage	10	0	0	0	0	0	0	0	0	0	0	0	10	10	10	10	10	10	10	10	10
		Urine catheter	10	0	0	0	0	0	0	0	0	0	0	0	10	10	10	10	10	10	10	10	10
		Urinary bag	10	0	0	0	0	0	0	0	0	0	0	0	10	10	10	10	10	10	10	10	10
		Canula	10	0	0	0	0	0	0	0	0	0	0	0	10	10	10	10	10	10	10	10	10
		Safety box	2	0	0	0	0	0	0	0	0	0	0	0	2	2	2	2	2	2	2	2	2
		File box	2	0	0	0	0	0	0	0	0	0	0	0	2	2	2	2	2	2	2	2	2
		HMIS Tools	1	0	0	0	0	0	0	0	0	0	0	0	1	1	1	1	1	1	1	1	1
		Dust bin	3	0	0	0	0	0	0	0	0	0	0	0	3	3	3	3	3	3	3	3	3
																							0	112	97.3913
	Lab Department	Microscope	1	0	0	0	0	0	0	0	0	0	0	0	1	1	1	1	1	1	1	1	1
		Colorimeter		0	0	0	0	0	0	0	0	0	0	0									0
		Chair	1	0	0	0	0	0	0	0	0	0	0	0	1	1	1	1	1	1	1	1	1
		Lab table	2	0	0	0	0	0	0	0	0	0	0	0	2	2	2	2	2	2	2	2	2
		Cupboard	1	0	0	0	0	0	0	0	0	0	0	0	1	1	1	1	1	1	1	1	1
		Power	1	0	0	0	0	0	0	0	0	0	0	0	1	1	1	1	1	1	1	1	1
		Hand washing facility	1	0	0	0	0	0	0	0	0	0	0	0	1	1	1	1	1	1	1	1	1
		Electronic centrifuge	1	0	0	0	0	0	0	0	0	0	0	0	1	1	1	1	1	1	1	1	1
		Gluco-meter	1	0	0	0	0	0	0	0	0	0	0	0	1	1	1	1	1	1	1	1	1
		Haemometer	2	0	0	0	0	0	0	0	0	0	0	0	1	1	1	1	1	1	1	1	1
		Blood container (EDTA)	1	0	0	0	0	0	0	0	0	0	0	0	1	1	1	1	1	1	1	1	1
		Blood lancet	1	0	0	0	0	0	0	0	0	0	0	0	1	1	1	1	1	1	1	1	1
		ESR RACKS	1	0	0	0	0	0	0	0	0	0	0	0	1	1	1	1	1	1	1	1	1
		ESR tubes	12	0	0	0	0	0	0	0	0	0	0	0									0
		Urine container	1	0	0	0	0	0	0	0	0	0	0	0	1	1	1	1	1	0	1	1	0.875
		Stool container	1	0	0	0	0	0	0	0	0	0	0	0	1	1	1	1	1	0	1	1	0.875
		Urine strips	1	0	0	0	0	0	0	0	0	0	0	0	1	1	1	1	1	0	1	1	0.875
		HCG test strip	1	0	0	0	0	0	0	0	0	0	0	0	1	1	1	1	1	0	1	1	0.875
		Rapid test VDRL	1	0	0	0	0	0	0	0	0	0	0	0	1	1	1	1	1	1	1	1	1
		Rapid test Malaria	1	0	0	0	0	0	0	0	0	0	0	0	1	1	1	1	1	0	1	1	0.875
		Test tubes	12	0	0	0	0	0	0	0	0	0	0	0	1	1	1	1	1	0	1	1	0.875
		Slides	1	0	0	0	0	0	0	0	0	0	0	0	1	1	1	1	1	1	1	1	1
		Cover glass	1	0	0	0	0	0	0	0	0	0	0	0	1	1	1	1	1	0	1	1	0.875
		Oil emersion	1	0	0	0	0	0	0	0	0	0	0	0	1	1	1	1	1	1	1	1	1
		HCL solution	1	0	0	0	0	0	0	0	0	0	0	0	1	1	1	1	1	0	1	1	0.875
		Tube racks	2	0	0	0	0	0	0	0	0	0	0	0	1	1	1	1	1	0	1	1	0.875
		Patient chair	2	0	0	0	0	0	0	0	0	0	0	0	1	1	1	1	1	0	1	1	0.875
		Lab coat	2	0	0	0	0	0	0	0	0	0	0	0	1	1	1	1	1	0	1	1	0.875
		WBC chamber	2	0	0	0	0	0	0	0	0	0	0	0	0	0	0	0	0	0	0	0	0
		Automatic pipette	2	0	0	0	0	0	0	0	0	0	0	0	1	1	1	1	1	1	1	1	1
		Safety box	2	0	0	0	0	0	0	0	0	0	0	0	2	2	2	2	2	2	2	2	2
		HMIS Tools	1	0	0	0	0	0	0	0	0	0	0	0	0	0	0	0	0	0	0	0	0
		File box	2	0	0	0	0	0	0	0	0	0	0	0	0	0	0	0	0	0	0	0	0
		Dust bin	2	0	0	0	0	0	0	0	0	0	0	0	0	0	0	0	0	0	0	0	0
																							0	28.625	44.0385
	Pharmacy	Shelves	1	0	0	0	0	0	0	0	0	0	0	0	1	1	1	1	1	1	1	1	1
		Cupboard	2	0	0	0	0	0	0	0	0	0	0	0	1	1	1	1	1	1	1	1	1
		Office chair	1	0	0	0	0	0	0	0	0	0	0	0	1	1	1	1	1	1	1	1	1
		Office table	2	0	0	0	0	0	0	0	0	0	0	0	1	1	1	1	1	1	1	1	1
		Box file	3	0	0	0	0	0	0	0	0	0	0	0	3	3	3	3	3	3	3	3	3
		Lap coat	2	0	0	0	0	0	0	0	0	0	0	0	2	2	2	2	2	2	2	2	2
		Marker pen	12	0	0	0	0	0	0	0	0	0	0	0	0	0	0	0	0	0	0	0	0
		Different type of drugs	1	0	0	0	0	0	0	0	0	0	0	0	1	1	1	1	1	1	1	1	1
		Drugs bags	1	0	0	0	0	0	0	0	0	0	0	0	1	1	1	1	1	1	1	1	1
		Registration form	1	0	0	0	0	0	0	0	0	0	0	0	1	1	1	1	1	1	1	1	1
		Tea spoon	1	0	0	0	0	0	0	0	0	0	0	0	1	1	1	1	1	1	1	1	1
		HMIS Tools	1	0	0	0	0	0	0	0	0	0	0	0	1	1	1	1	1	1	1	1	1
		Labeling of the drugs	1	0	0	0	0	0	0	0	0	0	0	0	1	1	1	1	1	1	1	1	1
		Dust bin	1	0	0	0	0	0	0	0	0	0	0	0	1	1	1	1	1	1	1	1	1
																							0	16	53.3333
	Vaccination room	Refrigerator	1	0	0	0	0	0	0	0	0	0	0	0	1	1	1	1	1	1	1	1	1
		Vaccines	1	0	0	0	0	0	0	0	0	0	0	0	1	1	1	1	1	1	1	1	1
		Vaccination syringes	1	0	0	0	0	0	0	0	0	0	0	0	1	1	1	1	1	1	1	1	1
		Cold chain boxes	2	0	0	0	0	0	0	0	0	0	0	0	2	2	2	2	2	2	2	2	2
		Safety box	2	0	0	0	0	0	0	0	0	0	0	0	2	2	2	2	2	2	2	2	2
		Office chair	1	0	0	0	0	0	0	0	0	0	0	0	1	1	1	1	1	1	1	1	1
		Patient chair	3	0	0	0	0	0	0	0	0	0	0	0	1	1	1	1	1	1	3	3	1.5
		Office table	1	0	0	0	0	0	0	0	0	0	0	0	1	1	1	1	1	1	1	1	1
		Cupboard	1	0	0	0	0	0	0	0	0	0	0	0	1	1	1	1	1	1	1	1	1
		File box	3	0	0	0	0	0	0	0	0	0	0	0	3	3	3	3	3	3	3	3	3
		Sprit	2	0	0	0	0	0	0	0	0	0	0	0	2	2	2	2	2	2	2	2	2
		Cotton	10	0	0	0	0	0	0	0	0	0	0	0	10	10	10	10	10	10	10	10	10
		Child Health cards		0	0	0	0	0	0	0	0	0	0	0									0
		HMIS Tools	1	0	0	0	0	0	0	0	0	0	0	0	1	1	1	1	1	1	1	1	1
		Dust bin	2	0	0	0	0	0	0	0	0	0	0	0	1	1	1	1	1	1	1	1	1
		IEC Materials	1	0	0	0	0	0	0	0	0	0	0	0	1	1	1	1	1	1	1	1	1
																							0	29.5	92.1875
	Community Health initiatives	CHWs	8	0	0	0	0	0	0	0	0	0	0	0	0	0	0	0	0	0	0	0	0
		Lead Mothers	4	0	0	0	0	0	0	0	0	0	0	0	0	0	0	0	0	0	0	0	0
		Mother Care Groups	4	0	0	0	0	0	0	0	0	0	0	0	0	0	0	0	0	0	0	0	0
		CHW teaching aid	8	0	0	0	0	0	0	0	0	0	0	0	2	2	2	2	2	2	2	2	2
		CHW referal booklet	8	0	0	0	0	0	0	0	0	0	0	0	2	2	2	2	2	2	2	2	2
		CHW reporting book	8	0	0	0	0	0	0	0	0	0	0	0	2	2	2	2	2	2	2	2	2
		Lead Mother Job aid	4	0	0	0	0	0	0	0	0	0	0	0									0
		Lead Mother referal booklet	4	0	0	0	0	0	0	0	0	0	0	0	1	1	1	1	1	1	1	1	1
		Lead Mother reporting book	4	0	0	0	0	0	0	0	0	0	0	0	1	1	1	1	1	1	1	1	1
		HF outreach plan	1	0	0	0	0	0	0	0	0	0	0	0	1	1	1	1	1	1	1	1	1
		HF catchment area	1	0	0	0	0	0	0	0	0	0	0	0	1	1	1	1	1	1	1	1	1
		Community Midwives	4	0	0	0	0	0	0	0	0	0	0	0	1	1	1	1	1	1	1	1	1
		Community Midwives repports	4	0	0	0	0	0	0	0	0	0	0	0	1	1	1	1	1	1	1	1	1
																							0
	Nutrition Services	Thermometers	4	0	0	0	0	0	0	0	0	0	0	0	4	4	4	4	4	4	4	4	4
		Salter scale (25 kg) (plus pants or plastic basin) or mother & child Electronic	1	0	0	0	0	0	0	0	0	0	0	0	1	1	1	1	1	1	1	1	1
		scale	1	0	0	0	0	0	0	0	0	0	0	0	1	1	1	1	1	1	1	1	1
		Height/Length board	3	0	0	0	0	0	0	0	0	0	0	0	3	3	3	3	3	3	3	3	3
		MUAC tapes (child)	1	0	0	0	0	0	0	0	0	0	0	0	1	1	1	1	1	1	1	1	1
		MUAC tapes (mother)	1	0	0	0	0	0	0	0	0	0	0	0	1	1	1	1	1	1	1	1	1
		Plastic matts (# 3) or Benches (# 6) in mothers waiting area	1	0	0	0	0	0	0	0	0	0	0	0	1	1	1	1	1	1	1	1	1
		Plastic matts in appetite test place	1	0	0	0	0	0	0	0	0	0	0	0	1	1	1	1	1	1	1	1	1
		Water container (# 3)	3	0	0	0	0	0	0	0	0	0	0	0	1	1	1	1	1	1	1	1	1
		Cups (# 15)	15	0	0	0	0	0	0	0	0	0	0	0	10	10	10	10	10	10	10	10	10
		Sugar	1	0	0	0	0	0	0	0	0	0	0	0	1	1	1	1	1	1	1	1	1
		Hand washing facility and water	1					0							1	1	1	1	1	1	1	1	1
		Amoxicillin	1	0	0	0	0	0	0	0	0	0	0	0	1	1	1	1	1	1	1	1	1
		Folic acid	1	0	0	0	0	0	0	0	0	0	0	0	1	1	1	1	1	1	1	1	1
		Vit A	1	0	0	0	0	0	0	0	0	0	0	0	1	1	1	1	1	1	1	1	1
		Measles vaccine	1	0	0	0	0	0	0	0	0	0	0	0	1	1	1	1	1	1	1	1	1
		Mebendazole	1	0	0	0	0	0	0	0	0	0	0	0	1	1	1	1	1	1	1	1	1
		Malaria diagnoses kit	1	0	0	0	0	0	0	0	0	0	0	0	1	1	1	1	1	1	1	1	1
		Urine analysis tool	1	0	0	0	0	0	0	0	0	0	0	0	1	1	1	1	1	1	1	1	1
		Stool analysis tool	1	0	0	0	0	0	0	0	0	0	0	0	1	1	1	1	1	1	1	1	1
		Water	1	0	0	0	0	0	0	0	0	0	0	0	1	1	1	1	1	1	1	1	1
		Latrine	1	1	1	1	1	1	1	1	1	1	1	1	1	1	1	1	1	1	1	1	1
		Soap	1	0	0	0	0	0	0	0	0	0	0	0	1	1	1	1	1	1	1	1	1
		Detergents	1	0	0	0	0	0	0	0	0	0	0	0	1	1	1	1	1	1	1	1	1
		Brooms	1	0	0	0	0	0	0	0	0	0	0	0	1	1	1	1	1	1	1	1	1
		Garbage /trash basket	1	0	0	0	0	0	0	0	0	0	0	0	1	1	1	1	1	1	1	1	1
		Incinerator	1	0	0	0	0	0	0	0	0	0	0	0	1	1	1	1	1	1	1	1	1
		Laminated sheet weight for height	1	0	0	0	0	0	0	0	0	0	0	0	1	1	1	1	1	1	1	1	1
		RUTF ration sheet	1	0	0	0	0	0	0	0	0	0	0	0	1	1	1	1	1	1	1	1	1
		Stationaries	1	0	0	0	0	0	0	0	0	0	0	0	1	1	1	1	1	1	1	1	1
		Child follow-up card (admission)	1	0	0	0	0	0	0	0	0	0	0	0	1	1	1	1	1	1	1	1	1
		Child registration book for out patient	1	0	0	0	0	0	0	0	0	0	0	0	1	1	1	1	1	1	1	1	1
		Health Education book	1	0	0	0	0	0	0	0	0	0	0	0	1	1	1	1	1	1	1	1	1
		Monitoring & supervision book (field monitoring visit)	1	1	0	0	0	0	0	0	0	0	0	0	1	1	1	1	1	1	1	1	1
		Referral card (child)	1	1	1	1	1	1	1	1	1	1	1	1	1	1	1	1	1	1	1	1	1
		Discharge card (child)	1	0	0	0	0	0	0	0	0	0	0	0	1	1	1	1	1	1	1	1	1
		Monthly report form 43	1	0	0	0	0	0	0	0	0	0	0	0	1	1	1	1	1	1	1	1	1
		Supply form	1	0	0	0	0	0	0	0	0	0	0	0	1	1	1	1	1	1	1	1	1
		Ration card (RUTF)	1	0	0	0	0	0	0	0	0	0	0	0	1	1	1	1	1	1	1	1	1
		Home visit sheets	1	0	0	0	0	0	0	0	0	0	0	0	1	1	1	1	1	1	1	1	1
		Map of catchment area	1	0	0	0	0	0	0	0	0	0	0	0	1	1	1	1	1	1	1	1	1
		Chart with target and admission per month	1	0	0	0	0	0	0	0	0	0	0	0	1	1	1	1	1	1	1	1	1
		Poster of Assessment and Classification of Children 6 to 59 months with Acute malnutrition	1	0	0	0	0	0	0	0	0	0	0	0	1	1	1	1	1	1	1	1	1
		Flow up chart for Assessment and Action for children between 6 to 59 months	1	0	0	0	0	0	0	0	0	0	0	0	1	1	1	1	1	1	1	1	1
		Basic messages for management of acute malnutrition	1	0	0	0	0	0	0	0	0	0	0	0	1	1	1	1	1	1	1	1	1
		Ready to use therapeutic food (RUTF)	1	0	0	0	0	0	0	0	0	0	0	0	1	1	1	1	1	1	1	1	1
		Ready to use supplementary food (RUSF	1	0	0	0	0	0	0	0	0	0	0	0	1	1	1	1	1	1	1	1	1
	Total Functionality		578	24	23	23	23	21	23	24	23	23	23	23	423	423	423	423	422	412	425	425
	Percentage Functionality			4.15225	3.97924	3.97924	3.97924	3.63322	3.97924	4.15225	3.97924	3.97924	3.97924	3.97924	73.1834	73.1834	73.1834	73.1834	73.0104	71.2803	73.5294	73.5294
	Minimuim Recommended Functionality			75	75	75	75	75	75	75	75	75	75	75	75	75	75	75	75	75	75	75
	Gap to attian MRF			70.8478	71.0208	71.0208	71.0208	71.3668	71.0208	70.8478	71.0208	71.0208	71.0208	71.0208	1.81661	1.81661	1.81661	1.81661	1.98962	3.71972	1.47059	1.47059

## Sheet: Staffing Norms 
			UNICEF PROJECT SITES						WHALES PROJECT SITES
		Reqiurements	Elferdous SSRS clinic	Elnabag Baglol	Esheria Clinic	Sania Afando	Shaga Toka	Um Eid Clinic	Elgedamia clinic	Gazala gawazat clinic	Average
PHU	Medical Doctor	1	1	1	1	1	1	1	0	0	0.75
	Specailist Physicians(Please specify) family medicine specialist	1									0
	Medical Assistant	3	3	3	3	3	3	1	0	0	2
											0
	Pharmacy assistant	2	1	1	1	1	1	1	1	1	1
	Midwife	4	2	2	2	2	2	2	2	2	2
	Health visitors	1									0
	EPI technicians	1	1	1	1	1	1	1	1	1	1
	Nurses	4	2	2	2	2	2	2	2	2	2
	Lab technician	1									0
	Lab Assistant	1									0
	Health promoters	1	1	1	1	1	1	1	1	1	1
	Nutrition assistant	1	1	1	1	1	1	1	0	0	0.75
	Community health workers	1									0
	Pharmacist	1									0
	Radio-technican	1									0
	Psychologist	1									0
	Dentist	1									0
	Dentist technican	1									0
	Optimologist	1									0
	Storekeeper	1									0
	Cleaner	3									0
	Volunteer	8									0
	Supervisor	1									0
											10.5	25.6098
	Medical Assistant	1									0
	Nutritionist	1									0
	Nutrition assistant	4									0
	Community health workers	1									0
	Optimologist	1									0
	Storekeeper	1							1	1	0.25
	Cleaner	1	1	1	1	1	1	1	1	1	1
	Volunteer	8									0
	Supervisor	1
											1.25	6.57895
Total Functionality		60	13	13	13	13	13	11	9	9
Percentage Functionality			21.6667	21.6667	21.6667	21.6667	21.6667	18.3333	15	15
Minimuim Recommended Functionality			75	75	75	75	75	75	75	75
Gap to attian minimum			53.3333	53.3333	53.3333	53.3333	53.3333	56.6667	60	60
