# Supplementary material for: Health Services Availability and Readiness Assessment in Sudan: A Comprehensive Evaluation of Health Facilities and System Preparedness in Four States
Source: Research Square preprint supplement (doi:10.21203/rs.3.rs-7818252/v1), 2025-11-26
Supplement: Supplementary file 7 [file SD SARA Tool for Sudan - South Darfur Cleaned.xlsx]

## Sheet: SARA 
			UNICEF PROJECT SITES																WHALES PROJECT SITES							ECHO PROJECT SITES									SHF PROJECT SITES											BMZ PROJECT SITES			GAC PROJECT SITES
Department	Item	reqiurement on site	Derage	Belai Refugees	MershingA	Juruf	Khorabashi	Negea	Bulbul	Kabum	Dalab	Tulus	RaseElfeel	Sergyla	Jidad	Almahara	Katila	Umtakina	Haraza PHC	KhorshamamPHC	Manawashi PHC	Mershing B	Donkey Deressa	Tally	Kerray	Alradom	Almashaga	karakada	Maramusa	Otash4	Otash13	Sanidalaba	Umgoia	Towal	Demo-PHC	Norli-PHC	Deri- PHC	Sesaban- PHC	Abusegan-PHC	Almaseed-PHC	Tagriba-PHC	Alsunta-PHC	Alhuda-PHC	Sanabo-PHC	Tabaldyat-PHC	Yara	Halof	Almlm north	Mueraia
Waiting shelter	Plastic table	2	2	2	2	2	1	2	2	2	2	2	2	2	1	2	2	3	2	2	2	2	2	2	2	2	2	2	2	2	2	2	2	2	2	2	2	2	2	2	2	2	2	2	2	0	0		0
	Office chair	2	1	1	2	1	1	1	1	1	1	1	1	1	1	2	2	2	2	2	2	2	2	2	2	2	2	2	2	2	2	2	2	2	2	2	2	1	0	0	1	1	2	2	2	1	1		1
	Plastic mates	5	2	2	3	2	2	5	2	2	2	3	1	1	2	1	1	4	5	5	5	5	5	5	5	5	5	5	5	5	5	5	5	5	3	3	3	5	2	5	4	5	4	4	3	0	0		0
	Plastic chairs	20	2	2	7	2	2	4	3	2	1	1	1	2	1	3	2	2	3	3	3	3	3	3	3	3	2	2	2	3	3	2	1	2	12	12	12	18	8	15	8	12	12	14	12	0	0		0
	Patient benches	10	3	3	10	3	3	6	3	3	2	0	2	2	1	3	4	5	8	8	8	8	8	8	8	10	10	10	10	10	10	10	10	10	7	4	8	6	5	7	6	4	2	4	3	4	4		10
	Water collar	1	0	0	0	0	0	0	0	0	0	0	0	0	0	0	0	0	1	1	1	1	1	1	1	1	1	1	1	1	1	1	1	1	1	1	1	1	1	1	1	1	1	1	1	0	0		0
	Water cups	4	1	2	2	1	2	2	2	1	1	1	1	1	1	1	1	1	4	4	4	4	4	4	4	4	4	4	4	4	4	4	4	4	4	4	4	4	4	4	4	3	4	4	4	0	0		0
	Board for advertisement	1	0	0	0	0	0	0	0	0	0	0	0	0	0	0	0	0	0	0	0	0	0	0	0	0	0	0	0	1	1	0	0	0	1	1	1	1	0	0	0	1	0	0	0	0	0		0
	Timer	1	0	0	1	0	0	0	0	0	0	0	0	0	0	0	0	0	0	0	0	0	0	0	0	1	1	1	1	1	1	1	1	1	1	1	1	1	1	1	1	1	1	1	1	0	0		0
	Thermometer	1	0	0	1	0	0	0	0	0	0	0	0	0	0	0	0	0	1	1	1	1	1	1	1	1	1	1	1	1	1	1	1	1	1	1	1	1	1	1	1	1	1	1	1	0	0		0
	Weight scale	1	0	0	0	0	0	1	0	0	0	0	0	1	0	0	0	0	1	1	1	1	1	1	1	1	1	1	1	1	1	1	1	1	1	1	1	1	1	1	1	1	1	1	1	0	0		0
	MUAC tape	2	1	0	0	1	1	2	2	1	1	1	1	1	1	1	1	1	0	0	0	0	0	0	0	2	2	2	2	2	2	2	2	2	2	2	2	2	1	1	1	2	2	1	2	0	0		0
	Manuals for health education	2	0	0	1	0	0	1	0	0	0	0	0	0	0	0	0	0	1	1	1	1	1	1	1	2	2	2	2	2	2	2	2	2	2	2	2	2	2	2	2	2	2	2	2	0	0		0
	Dust bin different size and color	3	0	0	1	0	0	1	0	0	0	0	0	0	0	0	0	0	2	2	2	2	2	2	2	3	3	3	3	3	2	3	3	2	3	3	3	2	3	3	3	3	3	3	3	0	0		3
	File box	1	1	1	1	1	1	1	1	1	1	1	1	1	1	1	1	1	1	1	1	1	1	1	1	1	1	1	1	1	1	1	1	1	1	1	1	1	1	1	1	1	1	1	1	0	0		1
	Water tank	1	1	1	1	1	1	1	1	1	1	1	1	1	1	1	1	1	1	1	1	1	1	1	1	1	1	1	1	1	1	1	1	1	1	1	1	1	1	1	1	1	1	1	1	1	1		1
	HMIS Tools	1	1	1	1	1	1	1	1	1	1	1	1	1	1	1	1	1	1	1	1	1	1	1	1	1	1	1	1	1	1	1	1	1	1	1	1	1	1	1	1	1	1	1	1	1	1		0
	Sign board	1	0	0	0	0	0	0	0	0	0	0	0	0	0	0	0	0	1	1	1	1	1	1	1	0	0	0	0	1	1	1	1	1	1	1	1	1	1	1	1	1	1	1	1	0	0		0
Medical assistant	Office table	1	1	1	1	1	1	1	1	1	1	1	1	1	1	1	1	1	1	1	1	1	1	1	1	1	1	1	1	1	1	1	1	1	1	1	1	1	1	1	1	1	1	1	1	1	1		1
	Office chair	1	1	1	1	1	1	1	1	1	1	1	1	1	1	1	1	1	1	1	1	1	1	1	1	1	1	1	1	1	1	1	1	1	1	1	1	1	1	1	1	1	1	1	1	1	1		1
	Patient chair	2	1	1	1	1	1	1	1	1	1	1	1	1	1	1	1	1	2	2	2	2	2	2	2	2	2	2	2	2	2	2	2	2	2	2	2	2	1	2	2	2	1	2	1	1	1		2
	Cupboard	1	0	0	1	0	0	1	0	1	1	0	0	0	0	0	0	0	1	1	1	1	1	1	1	1	1	1	1	1	1	1	1	1	1	1	1	1	1	1	1	1	1	1	1	1	1		0
	Sphygmomanometer	1	0	0	1	0	0	0	0	0	0	0	0	0	0	0	0	0	1	1	1	1	1	1	1	1	1	1	1	1	1	1	1	1	1	1	1	1	1	1	1	1	1	1	1	1	1		1
	Stethoscope	1	0	0	1	0	0	0	0	0	0	0	0	0	0	0	0	0	1	1	1	1	1	1	1	1	1	1	1	1	1	1	1	1	1	1	1	1	1	1	1	1	1	1	1	1	1		0
	Thermometer	1	0	0	1	0	0	1	0	0	0	0	0	0	0	0	0	0	1	1	1	1	1	1	1	1	1	1	1	1	1	1	1	1	1	1	1	1	1	1	1	1	1	1	1	1	1		0
	Respiratory timer	1	0	0	1	0	0	0	0	0	0	0	0	0	0	0	0	0	0	0	0	0	0	0	0	1	1	1	1	1	1	1	1	1	1	1	1	1	1	1	1	1	1	1	1	0	0		0
	Screen	1	0	0	0	0	0	0	0	0	0	0	0	0	0	0	0	0	1	1	1	1	1	1	1	1	1	1	1	1	1	1	1	1	1	1	1	1	1	1	1	1	1	1	1	0	0		0
	Examination bed	1	1	1	1	1	1	1	1	1	1	0	1	1	1	1	1	1	1	1	1	1	1	1	1	1	1	1	1	1	1	1	1	1	1	1	1	1	1	1	1	1	1	1	1	1	1		1
	Hand washing facility	1	1	1	1	1	1	1	1	1	1	0	1	1	1	1	1	1	1	1	1	1	1	1	1	1	1	1	1	1	1	1	1	1	1	1	1	1	1	1	1	1	1	1	1	1	1		0
	Towels	2	0	0	1	0	0	0	0	0	0	0	0	0	0	0	0	0	2	2	2	2	2	2	2	2	2	2	2	2	2	2	2	1	1	1	1	1	1	1	1	1	1	1	1	1	1		0
	Gloves (Box)	1	1	1	1	1	1	1	1	1	1	1	1	1	1	1	1	1	1	1	1	1	1	1	1	1	1	1	1	1	1	1	1	1	1	1	1	1	1	1	1	1	1	1	1	1	1		1
	Soap	1	1	1	1	1	1	1	1	1	1	1	1	1	1	1	1	1	1	1	1	1	1	1	1	1	1	1	1	1	1	1	1	1	1	1	1	1	1	1	1	1	1	1	1	1	1		1
	Torch	1	0	0	0	0	0	1	1	1	1	0	0	0	0	0	0	0	0	0	0	0	0	0	0	1	1	1	1	1	1	1	1	1	1	1	1	1	1	1	1	1	1	1	1	0	0		0
	Lab coat	2	0	0	0	0	0	0	0	0	0	0	0	0	0	0	0	0	1	1	2	2	1	1	1	2	2	2	2	2	2	2	2	1	1	1	1	1	1	1	1	1	1	1	1	1	1		2
	Tongue depressor (Box)	1	0	0	0	0	0	0	0	0	0	0	0	0	0	0	0	0	1	1	1	1	1	1	1	1	1	1	1	1	1	1	1	1	1	1	1	1	1	1	1	1	1	1	1	0	1		0
	Scale	1	0	0	0	0	0	0	0	1	0	0	0	1	0	0	0	0	0	0	1	1	1	1	1	1	1	1	1	1	1	1	1	1	1	1	1	1	1	1	1	1	1	1	1	1	1		0
	Treatment protocols	1	1	1	1	1	0	1	1	1	1	1	1	1	1	1	1	1	1	1	1	1	1	1	1	1	1	1	1	1	1	1	1	1	1	1	1	1	1	1	1	1	1	1	1	1	1		1
	File box	1	1	1	1	1	0	1	1	1	1	1	1	1	1	1	1	1	1	1	1	1	1	1	1	1	1	1	1	1	1	1	1	1	1	1	1	1	1	1	1	1	1	1	1	0	0		1
	IEC Materials	1	1	1	1	1	0	1	1	1	1	1	1	1	1	1	1	1	1	1	1	1	1	1	1	1	1	1	1	1	1	1	1	1	1	1	1	1	1	1	1	1	1	1	1	0	0		0
	HMIS Tools	1	0	0	0	0	1	0	1	0	1	0	0	0	0	0	1	0	1	1	1	1	1	1	1	1	1	1	1	1	1	1	1	1	1	1	1	1	1	1	1	1	1	1	1	1	1		0
	Prescription paper	1	0	0	0	0	1	0	0	0	0	0	0	0	0	0	0	0	1	1	1	1	1	1	1	1	1	1	1	1	1	1	1	1	1	1	1	1	1	1	1	1	1	1	1	1	1		1
	Office table	1	1	1	1	1	1	1	1	1	1	1	1	1	1	1	1	1	1	1	1	1	1	1	1	1	1	1	1	1	1	1	1	1	1	1	1	1	1	1	1	1	1	1	1	1	1		1
Midwife	Midwife protocols	1	0	0	0	0	1	0	0	0	0	0	0	0	0	0	0	0	1	1	1	1	1	1	1	1	1	1	1	1	1	1	1	1	1	1	1	1	1	1	1	1	1	1	1	1	1		0
	Office chair	1	1	1	1	1	1	1	1	1	1	1	1	1	1	1	1	1	1	1	1	1	1	1	1	1	1	1	1	1	1	1	1	1	1	1	1	1	1	1	1	1	1	1	1	1	0		0
	Examination bed	1	1	1	1	1	1	1	1	1	1	1	1	1	1	1	1	1	1	1	1	1	1	1	1	1	1	1	1	1	1	1	1	1	1	1	1	1	0	0	1	1	1	0	0	1	1		0
	Screen	2	0	0	0	0	0	0	1	1	0	0	0	0	0	0	0	0	1	1	1	1	1	1	1	2	2	2	2	2	2	2	2	1	1	1	1	1	1	1	1	1	1	1	1	0	0		0
	Delivery bed	1	0	0	1	0	1	1	1	1	1	0	0	1	0	0	0	0	0	0	0	0	0	0	0	1	1	1	1	1	1	1	1	1	1	1	1	1	1	1	1	1	1	1	1	1	1		0
	Delivery set	1	0	0	0	0	1	0	1	1	0	0	0	0	0	0	0	0	0	0	0	0	0	0	0	1	1	1	1	1	1	1	1	1	1	1	1	1	1	1	1	1	1	1	1	1	1		0
	Trolley	1	0	0	0	0	0	0	0	0	0	0	0	0	0	0	0	0	0	0	0	0	0	0	0	1	1	1	1	1	1	1	1	1	1	1	1	1	1	1	1	1	1	1	1	1	1		0
	Ambo bag	1	0	0	0	0	0	0	0	0	0	0	0	0	0	0	0	0	0	0	0	0	0	0	0	1	1	1	1	1	1	1	1	1	1	1	1	1	1	1	1	1	1	1	1	1	1		0
	Patient bed	2	0	0	0	0	1	0	1	1	1	0	0	0	0	0	0	1	2	2	2	2	2	2	2	2	2	2	2	2	2	2	2	1	2	2	2	2	1	1	2	2	2	1	1	2	1		0
	Mattresses	2	0	0	0	0	0	0	0	0	0	0	0	0	0	0	0	0	2	2	2	2	2	2	2	2	2	2	2	2	2	2	2	1	2	2	2	2	0	0	2	2	2	0	0	1	1		0
	Bed sheets	2	0	0	0	0	1	0	1	1	1	0	0	0	0	0	0	1	2	2	2	2	2	2	2	2	2	2	2	2	2	2	2	2	2	2	2	2	0	0	2	2	2	0	0	1	1		0
	Cupboard	1	0	1	0	0	1	0	0	0	1	0	0	0	0	0	0	1	1	1	1	1	1	1	1	1	1	1	1	1	1	1	1	1	1	1	1	1	1	1	1	1	1	1	1	1	1		0
	Drip stand	2	1	1	1	1	1	1	1	1	1	1	1	1	1	1	1	1	2	2	2	2	2	2	2	2	2	2	2	2	2	2	2	2	2	2	2	2	2	2	2	2	2	2	1	2	1		0
	Kidney dish	2	0	0	0	0	0	0	0	0	0	0	0	0	0	0	0	0	1	1	1	1	1	1	1	2	2	2	2	2	2	2	2	2	2	2	2	2	2	2	2	2	2	2	1	0	0		0
	Urine basin	2	0	0	0	0	0	0	0	0	0	0	0	0	0	0	0	0	2	2	2	2	2	2	2	2	2	2	2	2	2	2	2	2	2	2	2	2	2	2	2	2	2	2	2	0	0		0
	Plastic basin	3	0	0	0	0	1	0	0	0	0	0	0	0	0	0	0	1								3	3	3	3	3	3	3	3	2	3	3	3	3	3	2	2	3	3	1	1	1	1		0
	Plastic buckets	6	0	0	2	0	1	0	0	0	1	0	0	0	0	0	0	1	3	3	3	3	3	3	3	6	6	6	6	6	6	6	6	5	4	5	3	2	3	2	3	2	3	4	3	0	0		0
	Plastic sheets	2	0	0	0	0	1	0	1	0	0	0	0	0	0	0	0	0	2	2	2	2	2	2	2	2	2	2	2	2	2	2	2	2	2	2	2	2	1	1	2	2	2	1	1	2	2		0
	Hand washing facility	1	0	0	0	0	1	1	1	1	0	0	0	0	0	0	0	1	1	1	1	1	1	1	1	1	1	1	1	1	1	1	1	1	1	1	1	1	1	1	1	1	1	1	1	0	1		0
	Clean delivery kits	1	0	0	0	0	0	0	1	0	0	0	0	0	0	0	0	1	1	1	1	1	1	1	1	1	1	1	1	1	1	1	1	1	1	1	1	1	1	1	1	1	1	1	1	1	1		0
	Lab coat	2	0	0	0	0	0	0	0	0	0	0	0	0	0	0	0	0	2	2	2	2	2	2	2	2	2	2	2	2	2	2	2	1	2	2	2	2	2	2	2	2	2	2	2	1	1		0
	Gloves (Box)	1	1	0	1	1	1	1	1	1	1	1	1	1	1	1	1	1	1	1	1	1	1	1	1	1	1	1	1	1	1	1	1	1	1	1	1	1	1	1	1	1	1	1	2	1	0		0
	Chlorhexidine	2	0	0	0	0	0	0	0	0	0	0	0	0	0	0	0	0	2	2	2	2	2	2	2	2	2	2	2	2	2	2	2	1	2	2	2	2	2	2	2	4	2	2	2	0	0		0
	Iodine	5	0	0	0	0	0	1	0	1	1	0	0	0	0	0	0	0	5	5	5	5	5	5	5	5	5	5	5	5	5	5	5	4	4	5	5	3	4	5	3	4	4	3	3	0	0		0
	Spirit	2	1	1	1	1	0	0	1	1	1	1	0	1	1	1	1	1	2	2	2	2	2	2	2	2	2	2	2	2	2	2	2	1	2	2	2	2	2	2	2	2	2	2	2	1	1		0
	Fefol	1	1	1	1	1	1	1	1	1	1	1	1	1	1	1	1	1	1	1	1	1	1	1	1	1	1	1	1	1	1	1	1	1	1	1	1	1	1	1	1	1	1	1	1	1	0		0
	Folic acid	1	0	1	0	1	1	0	1	0	1	0	0	0	0	1	0	0	1	1	1	1	1	1	1	1	1	1	1	1	1	1	1	1	1	1	1	1	1	1	1	1	1	1	1	0	1		0
	ANC cards		0	0	0	0	0	0	0	0	0	0	0	0	0	0	0	0								20	20	20	20	20	20	20	20	14	21														0
	Catgut suture	12	0	0	0	0	0	0	0	0	0	0	0	0	0	0	0	0	12	12	12	10	12	5	4	12	12	12	12	12	11	12	12	12	12	12	12	12	12	12	12	12	12	12	12	0	0		0
	Sterile gauze	1	1	1	0	1	1	1	1	0	1	1	1	1	1	1	1	0	1	1	1	1	1	1	1	1	1	1	1	1	1	1	1	1	1	1	1	1	1	1	1	1	1	1	1	0	0		0
	Cotton wool	10	0	0	0	0	1	1	0	1	0	0	0	0	0	0	0	0	3	3	3	3	3	3	3	10	10	10	10	10	10	10	10	10	1	10	10	10	10	10	10	10	10	10	10	0	0		0
	Sphygmomanometer	1	0	0	0	0	0	0	0	0	0	0	0	0	0	0	0	0	1	1	1	1	1	1	1	1	1	1	1	1	1	1	1	1	1	1	1	1	1	1	1	1	1	1	1	1	1		0
	Stethoscope	1	0	0	0	0	0	0	0	0	0	0	0	0	0	0	0	0	1	1	1	1	1	1	1	1	1	1	1	1	1	1	1	1	1	1	1	1	1	1	1	1	1	1	1	1	0		0
	Fetoscope	1	0	0	0	0	0	0	0	0	0	0	0	0	0	0	0	0	1	1	1	1	1	1	1	1	1	1	1	1	1	1	1	1	1	1	1	1	1	1	1	1	1	1	1	1	1		0
	Baby scale	1	0	0	0	0	0	0	0	0	0	0	0	0	0	0	0	0	0	0	0	0	0	0	0	1	1	1	1	1	1	1	1	1	1	1	1	1	1	1	1	1	1	1	1	1	1		0
	Baby bed	1	0	0	0	0	0	0	0	0	0	0	0	0	0	0	0	0	0	0	0	0	0	0	0	1	1	1	1	1	1	1	1	1	1	1	1	1	1	1	1	1	1	1	1	1	0		0
	Patient chair	2	0	0	0	0	1	0	0	0	0	0	0	0	0	0	0	0	2	2	2	2	2	2	2	2	2	2	2	2	2	2	2	1	2	2	2	2	2	2	2	2	2	2	2	1	0		0
	Soap	1	0	0	0	0	1	1	0	0	0	0	0	0	0	0	0	0	1	1	1	1	1	1	1	1	1	1	1	1	1	1	1	1	1	1	1	1	1	1	1	1	1	1	1	1	1		0
	Cazerameel	2	0	0	0	0	0	0	0	0	0	0	0	0	0	0	0	0	1	1	1	1	1	1	1	2	2	2	2	2	2	2	2	2	2	2	2	2	2	2	1	2	2	2	2	1	1		0
	Urine catheter	5	0	0	0	0	0	0	0	0	0	0	0	0	0	0	0	0	5	5	5	5	5	5	5	5	5	5	5	5	5	5	5	5	5	5	5	5	5	5	5	5	5	5	5	5	5		0
	Urinary metallic catheter	2	0	0	0	0	0	0	0	0	0	0	0	0	0	0	0	0	0	0	0	0	0	0	0	2	2	2	2	2	2	2	2	2	2	2	2	2	2	2	2	2	2	2	2	0	0		0
	Canula	10	5	3	3	5	3	2	5	0	2	3	4	6	9	7	3	10	10	10	10	10	10	10	10	10	10	10	10	10	10	10	10	10	10	10	10	10	10	10	10	10	10	10	10	0	0		0
	Lidocaine	5	0	0	0	3	0	0	0	0	0	0	0	0	0	0	0	0	5	5	5	5	5	5	5	5	5	5	5	5	5	5	5	5	1	5	5	5	5	5	5	5	5	5	5	0	0		0
	Adult scale	1	0	0	0	1	0	0	0	0	0	0	0	0	0	0	0	0	1	1	1	1	1	1	1	1	1	1	1	1	1	1	1	1	1	1	1	1	1	1	1	1	1	1	1	1	1		0
	Towels	2	0	0	0	0	0	0	0	0	0	0	0	0	0	0	0	0	2	2	2	2	2	2	2	2	2	2	2	2	2	2	2	2	2	1	1	1	1	1	1	1	1	1	1	0	0		0
	Mosquito nets	1	0	0	0	0	0	0	0	0	0	0	0	0	0	0	0	0	0	0	0	0	0	0	0	1	1	1	1	1	1	1	1	1	1	1	1	1	1	1	1	1	1	1	1	0	0		0
	Sucker	1	0	0	0	0	0	0	0	0	0	0	0	0	0	0	0	0	0	0	0	0	0	0	0	1	1	1	1	1	1	1	1	1	1	1	1	1	1	1	1	1	1	1	1	1	1		0
	Safety box	2	2	2	2	2	2	2	2	0	2	1	2	2	2	2	2	2	2	2	2	2	2	2	2	2	2	2	2	2	2	2	2	2	2	2	2	2	2	2	2	2	2	2	2	1	1		0
	File box	2	0	0	0	1	1	0	1	0	1	0	0	0	0	0	0	0	2	2	2	2	2	2	2	2	2	2	2	2	2	2	2	2	2	2	2	2	2	2	2	2	2	2	2	0	0		0
	HMIS Tools	1	0	0	1	1	0	0	1	0	1	0	0	0	0	0	0	0	1	1	1	1	1	1	1	1	1	1	1	1	1	1	1	1	1	1	1	1	1	1	1	1	1	1	1	1	1		0
	IEC materials protocols	1	1	1	1	1	1	1	1	1	1	1	1	1	1	1	1	1	1	1	1	1	1	1	1	2	2	2	2	2	2	2	2	2	1	1	1	1	1	1	1	1	1	2	1	0	0		0
	Dust bin	2	0	0	0	0	0	0	0	0	0	0	0	0	0	0	0	0	1	1	1	1	1	1	1	2	2	2	2	2	2	2	2	2	1	2	2	2	2	2	2	2	2	2	2	1	1		0
Nursing room	Autoclave	1	1	1	1	1	1	0	1	1	1	1	1	1	1	1	1	1	0	0	0	0	0	0	0	1	1	1	1	1	1	1	1	1	1	1	1	1	1	1	1	1	1	1	1	1	1		1
	Stove	1	0	1	0	0	0	0	0	0	0	0	0	0	0	0	0	0	0	0	0	0	0	0	0	1	1	1	1	1	1	1	1	1	1	1	1	1	1	1	1	1	1	1	1	0	0		0
	Gas cylinder	1	0	0	0	0	0	0	0	0	0	0	0	0	0	0	0	0	0	0	0	0	0	0	0	1	1	1	1	1	1	1	1	1	1	1	1	0	0	0	1	1	0	0	0	1	1		0
	Cupboard	1	0	0	0	1	0	0	0	0	0	0	0	0	0	0	0	0	1	1	1	1	1	1	1	1	1	1	1	1	1	1	1	1	1	1	1	1	1	1	1	1	1	1	1	1	1		0
	Patient bed	4	0	0	0	0	0	0	0	0	0	0	0	0	0	0	0	0	2	2	2	2	2	2	2	4	4	4	4	4	4	4	4	4	3	3	1	3	2	1	3	4	3	1	1	0	0		4
	Drip stand	2	0	0	0	0	0	0	0	0	0	0	0	0	0	0	0	0	1	1	1	1	1	1	1	2	2	2	2	2	2	2	2	2	2	2	2	2	2	2	2	2	2	2	2	1	0		2
	Plastic table	1	1	1	1	1	1	0	1	1	1	1	1	1	1	1	1	1	1	1	1	1	1	1	1	1	1	1	1	1	1	1	1	1	1	1	1	1	1	1	1	1	1	1	1	1	1		1
	Plastic chair	3	2	2	2	2	2	0	2	2	2	2	1	2	2	2	2	2	3	3	3	3	3	3	3	3	3	3	3	3	3	3	3	3	1	3	3	3	3	2	3	3	3	2	3	1	1		2
	Dressing set	2	0	0	0	0	0	0	0	0	0	0	0	0	0	0	0	0	0	0	0	0	0	0	0	2	2	2	2	2	2	2	2	2	2	1	1	1	1	1	1	1	1	1	1	1	1		1
	Cazerameel	2	0	0	0	0	0	0	0	0	0	0	0	0	0	0	0	0	1	1	1	1	1	1	1	2	2	2	2	2	2	2	2	2	2	2	2	2	2	2	2	2	2	2	2	1	1		0
	Lidocaine	5	0	0	0	0	0	0	0	0	1	0	0	0	0	0	0	0	5	5	5	5	5	5	5	5	5	5	5	5	5	5	5	5	2	3	3	3	3	3	3	3	3	3	3	1	1		2
	Lab coat	2	0	0	0	0	0	0	0	0	0	0	0	0	0	0	0	0	1	1	1	1	1	1	1	2	2	2	2	2	2	2	2	2	1	2	2	2	2	2	2	2	2	2	2	1	1		2
	Gloves	1	1	1	1	1	1	1	1	0	0	1	1	1	1	1	1	1	1	1	1	1	1	1	1	1	1	1	1	1	1	1	1	1	1	1	1	1	1	1	1	1	1	1	1	1	1		1
	Chlorhexidine	3	1	1	1	1	1	1	1	0	0	1	1	1	1	1	1	1	3	3	3	3	3	3	3	3	3	3	3	3	3	3	3	3	3	2	2	2	2	2	2	2	2	2	2	0	0		2
	Iodine	5	1	1	1	1	1	1	0	0	1	1	1	1	1	1	1	1	5	5	5	5	5	5	5	5	5	5	5	5	5	5	5	5	2	4	4	4	4	4	4	4	4	4	4	1	1		5
	Spirit	2	0	0	1	1	0	0	0	0	0	0	0	0	0	0	0	0	2	2	2	2	2	2	2	2	2	2	2	2	2	2	2	2	2	2	2	2	2	2	2	2	2	2	2	1	1		1
	Catgut suture	12	0	0	0	0	0	0	0	0	0	0	0	0	0	0	0	0	6	6	6	6	6	6	6	12	12	12	12	12	12	12	12	12	6	7	7	6	9	11	7	8	12	4	6	0	0		3
	Mattresses	4	0	0	0	0	0	0	0	0	0	0	0	0	0	0	0	0	4	4	4	4	4	4	4	4	4	4	4	4	4	4	4	4	4	4	4	4	4	4	4	4	4	4	4	0	0		3
	Bed sheets	4	0	0	2	0	0	0	1	0	1	0	0	0	0	0	0	0	4	4	4	4	4	4	4	4	4	4	4	4	4	4	4	4	4	2	2	4	1	1	0	4	4	0	0	0	0		3
	Gauze roll	1	0	0	1	0	0	0	0	0	0	0	0	0	0	0	0	0	1	1	1	1	1	1	1	1	1	1	1	1	1	1	1	1	1	1	1	1	1	1	1	1	1	1	1	0	0		1
	Gauze bandage	10	0	0	1	0	0	0	0	0	0	0	0	0	0	0	0	0	0	0	0	0	0	0	0	10	10	10	10	10	10	10	10	10	10	10	10	10	10	10	10	10	10	10	10	0	0		3
	Crept bandage	10	0	0	0	0	0	0	0	0	0	0	0	0	0	0	0	0	10	10	10	10	10	10	10	10	10	10	10	10	10	10	10	10	10	10	7	9	10	10	10	10	10	10	10	0	0		3
	Urine catheter	10	0	0	0	0	0	0	0	0	0	0	0	0	0	0	0	0	10	10	10	10	10	10	10	10	10	10	10	10	10	10	10	10	10	10	8	10	10	9	9	8	7	10	10	0	0		10
	Urinary bag	10	0	0	0	0	0	0	0	0	0	0	0	0	0	0	0	0	10	10	10	10	10	10	10	10	10	10	10	10	10	10	10	10	10	10	8	10	10	9	9	8	7	10	10	0	0		1
	Canula	10	0	0	0	0	0	0	2	0	0	0	0	0	0	0	0	0	10	10	10	10	10	10	10	10	10	10	10	10	10	10	10	10	1	10	10	10	10	10	10	10	10	10	10	0	0		10
	Safety box	2	1	1	2	1	1	1	1	0	1	1	1	1	1	1	1	1	2	2	2	2	2	2	2	2	2	2	2	2	2	2	2	2	2	1	1	1	1	1	1	1	1	1	1	1	1		2
	File box	2	1	1	1	1	1	1	1	0	1	1	1	1	1	1	1	1	1	1	1	1	1	1	1	2	2	2	2	2	2	2	2	2	1	2	2	2	2	2	2	2	2	2	2	0	0		2
	HMIS Tools	1	0	0	0	1	0	0	0	0	1	0	0	0	0	0	0	1	1	1	1	1	1	1	1	1	1	1	1	1	1	1	1	1	1	1	1	1	1	1	1	1	1	1	1	0	0		1
	Dust bin	3	0	0	0	0	0	0	0	0	0	0	0	0	0	0	0	0	1	1	1	1	1	1	1	3	3	3	3	3	3	3	3	3	1	3	3	3	3	3	3	3	3	3	3	1	1		3
Lab Department	Microscope	1	0	0	1	0	0	0	0	0	0	0	0	0	0	0	0	0	1	1	1	1	1	1	1	1	1	1	1	1	1	1	1	1	1	1	1	1	1	1	1	1	1	1	1	0	0		1
	Colorimeter		0	0	0	0	0	0	0	0	0	0	0	0	0	0	0	0	1	1	1	1	1	1	1	0	0	0	0	0	0	0	0	0	4	1	1	1	1	1	1	1	1	1	1	0	0		0
	Chair	1	0	0	0	0	0	0	0	0	0	0	0	0	0	0	0	0	1	1	1	1	1	1	1	1	1	1	1	1	1	1	1	1	1	1	1	1	1	1	1	1	1	1	1	0	0		1
	Lab table	2	0	0	1	0	0	0	0	0	0	0	0	0	0	0	0	0	0	0	0	0	0	0	0	2	2	2	2	2	2	2	2	2	1	1	1	1	1	1	1	1	1	1	1	1	1		0
	Cupboard	1	0	0	1	0	0	0	0	0	0	0	0	0	0	0	0	0	1	1	1	1	1	1	1	1	1	1	1	1	1	1	1	1	1	1	1	1	1	1	1	1	1	1	1	1	1		0
	Power	1	0	0	0	0	0	0	0	0	0	0	0	0	0	0	0	0	0	0	0	0	0	0	0	1	1	1	1	1	1	1	1	1	1	1	1	1	1	1	1	1	1	1	1	0	0		0
	Hand washing facility	1	1	1	1	0	1	1	1	1	0	1	1	1	1	1	1	1	1	1	1	1	1	1	1	1	1	1	1	1	1	1	1	1	0	1	1	1	1	1	1	1	1	1	1	0	0		1
	Electronic centrifuge	1	0	0	0	0	0	0	0	0	0	0	0	0	0	0	0	0	1	1	1	1	1	1	1	0	0	0	0	0	0	0	0	0	1	0	0	0	0	0	0	0	0	0	0	0	0		1
	Gluco-meter	1	0	0	0	0	0	0	0	0	0	0	0	0	0	0	0	0	1	1	1	1	1	1	1	0	0	0	0	0	0	0	0	0	1	1	1	1	1	1	1	1	1	1	1	0	0		0
	Haemometer	2	0	0	0	0	0	0	0	0	0	0	0	0	0	0	0	0	1	1	1	1	1	1	1	0	0	0	0	0	0	0	0	0	2	1	1	1	1	1	1	1	1	1	1	0	0		0
	Blood container (EDTA)	1	0	0	1	0	0	0	0	0	0	0	0	0	0	0	0	0	1	1	1	1	1	1	1	1	1	1	1	1	1	1	1	0	1	1	1	1	1	1	1	1	1	1	1	0	0		1
	Blood lancet	1	0	0	1	0	0	0	0	0	0	0	0	0	0	0	0	0	1	1	1	1	1	1	1	1	1	1	1	1	1	1	1	1	1	1	1	1	1	1	1	1	1	1	1	0	0		1
	ESR RACKS	1	0	0	0	0	0	0	0	0	0	0	0	0	0	0	0	0	1	1	1	1	1	1	1	0	0	0	0	0	0	0	0	0	1	1	1	1	1	1	1	1	1	1	1	0	0		1
	ESR tubes	12	0	0	0	0	0	0	0	0	0	0	0	0	0	0	0	0	12	12	12	12	12	12	12	0	0	0	0	12	12	12	12	12	12	12	12	12	12	12	12	12	12	12	12	0	0		5
	Urine container	1	0	0	1	0	0	0	0	0	0	0	0	0	0	0	0	0	1	1	1	1	1	1	1	1	1	1	1	1	1	1	1	1	1	1	1	1	1	1	1	1	1	1	1	0	0		1
	Stool container	1	0	0	0	0	0	0	0	0	0	0	0	0	0	0	0	0	1	1	1	1	1	1	1	1	1	1	1	1	1	1	1	1	1	1	1	1	1	1	1	1	1	1	1	0	0		1
	Urine strips	1	0	0	1	0	0	0	0	0	0	0	0	0	0	0	0	0	1	1	1	1	1	1	1	1	1	1	1	1	1	1	1	1	1	1	1	1	1	1	1	1	1	1	1	1	1		1
	HCG test strip	1	0	0	0	0	0	0	0	0	0	0	0	0	0	0	0	0	1	1	1	1	1	1	1	1	1	1	1	1	1	1	1	1	1	1	1	1	1	1	1	1	1	1	1	1	1		1
	Rapid test VDRL	1	0	0	0	0	0	0	0	0	0	0	0	0	0	0	0	0	0	0	0	0	0	0	0	0	0	0	0	1	1	0	0	1	1	1	1	1	1	1	1	1	1	1	1	0	0		1
	Rapid test Malaria	1	0	0	1	0	0	0	0	0	0	0	0	0	0	0	0	0	1	1	1	1	1	1	1	1	1	1	1	1	1	1	1	1	1	1	1	1	1	1	1	1	1	1	1	1	1		1
	Test tubes	12	0	0	1	0	0	0	0	0	0	0	0	0	0	0	0	0	12	12	12	12	12	12	12	12	12	12	12	12	12	12	12	12	12	12	12	12	12	12	12	12	12	12	12	0	0		10
	Slides	1	0	0	1	0	0	0	0	0	0	0	0	0	0	0	0	0	1	1	1	1	1	1	1	1	1	1	1	1	1	1	1	1	1	1	1	1	1	1	1	1	1	1	1	0	0		1
	Cover glass	1	0	0	1	0	0	0	0	0	0	0	0	0	0	0	0	0	1	1	1	1	1	1	1	1	1	1	1	1	1	1	1	1	1	1	1	1	1	1	1	1	1	1	1	0	0		1
	Oil emersion	1	0	0	0	0	0	0	0	0	0	0	0	0	0	0	0	0	0	0	0	0	0	0	0	1	1	1	1	1	1	1	1	1	1	1	1	1	1	1	1	1	1	1	1	0	0		1
	HCL solution	1	0	0	0	0	0	0	0	0	0	0	0	0	0	0	0	0	0	0	0	0	0	0	0	1	1	1	1	1	1	1	1	1	1	1	1	1	1	1	1	1	1	1	1	0	0		1
	Tube racks	2	0	0	1	0	0	0	0	0	0	0	0	0	0	0	0	0	2	2	2	2	2	2	2	2	2	2	2	2	2	2	2	1	2	2	2	2	2	2	2	2	2	2	2	0	0		2
	Patient chair	2	0	0	1	0	0	0	0	0	0	0	0	0	0	0	0	0	2	2	2	2	2	2	2	2	2	2	2	2	2	2	2	2	2	2	2	2	2	2	2	2	2	2	2	1	1		1
	Lab coat	2	0	0	0	0	0	0	0	0	0	0	0	0	0	0	0	0	1	1	1	1	1	1	1	2	2	2	2	2	2	2	2	1	1	2	2	2	2	2	2	2	2	2	2	1	1		1
	WBC chamber	2	0	0	0	0	0	0	0	0	0	0	0	0	0	0	0	0	0	0	0	0	0	0	0	2	2	2	2	2	2	2	2	1	2	1	1	1	1	1	1	1	1	1	1	0	0		1
	Automatic pipette	2	0	0	0	0	0	0	0	0	0	0	0	0	0	0	0	0	2	2	2	2	2	2	2	1	1	1	1	1	1	1	1	1	2	2	2	2	2	2	2	2	2	2	2	0	0		1
	Safety box	2	1	1	1	0	1	1	0	0	0	1	1	1	1	1	1	1	1	1	1	1	1	1	1	2	2	2	2	2	2	2	2	1	1	2	2	2	2	2	2	2	2	2	2	1	1		1
	HMIS Tools	1	1	1	1	0	1	1	0	0	0	1	1	1	1	1	1	1	1	1	1	1	1	1	1	1	1	1	1	1	1	1	1	1	1	1	1	1	1	1	1	1	1	1	1	1	1		0
	File box	2	1	1	1	0	1	1	0	0	0	1	1	1	1	1	1	1	1	1	1	1	1	1	1	2	2	2	2	2	2	2	2	1	2	2	2	2	2	2	2	2	2	2	2	0	0		2
	Dust bin	2	0	0	0	0	0	0	0	0	0	0	0	0	0	0	0	0	2	2	2	2	2	2	2	1	1	1	1	1	1	1	1	1	2	2	2	2	2	2	2	2	2	2	2	1	1		1
Pharmacy	Shelves	1	0	0	0	0	0	0	0	0	0	0	0	0	0	0	0	0	0	0	0	0	0	0	0	1	1	1	1	1	1	1	1	1	2	1	1	1	1	1	1	1	1	1	1	1	1		1
	Cupboard	2	1	1	1	1	1	1	1	1	1	1	1	1	1	1	1	1	1	1	1	1	1	1	1	1	1	1	1	1	1	1	1	1	2	2	2	2	2	2	2	2	2	2	2	1	1		1
	Office chair	1	1	1	1	1	1	1	1	1	1	1	1	1	1	1	1	1	1	1	1	1	1	1	1	1	1	1	1	1	1	1	1	1	1	1	1	1	1	1	1	1	1	1	1	1	1		1
	Office table	2	1	1	1	1	1	1	1	1	1	1	1	1	1	1	1	1	1	1	1	1	1	1	1	2	2	2	2	2	2	2	2	2	2	1	1	1	1	1	1	1	1	1	1	1	1		1
	Box file	3	1	0	1	1	1	1	1	1	1	1	1	1	1	1	1	1	1	1	1	1	1	1	1	3	3	3	3	3	3	3	3	3	2	3	3	3	3	3	3	3	3	3	3	0	0		2
	Lap coat	2	0	0	0	0	0	0	0	0	0	0	0	0	0	0	0	0	1	1	1	1	1	1	1	2	2	2	2	2	2	2	2	2	2	2	2	2	2	2	2	2	2	2	2	1	1		2
	Marker pen	12	0	0	1	0	0	0	0	0	0	0	0	0	0	0	0	0	2	2	2	2	2	2	2	12	12	12	12	12	12	12	12	12	12	8	8	8	8	8	8	8	8	8	8	0	0		3
	Different type of drugs	1	1	0	0	1	1	1	1	0	1	1	1	1	1	1	1	1	1	1	1	1	1	1	1	1	1	1	1	1	1	1	1	1	1	1	1	1	1	1	1	1	1	1	1	1	1		1
	Drugs bags	1	0	0	0	0	0	0	1	0	0	0	0	0	0	0	0	0	1	1	1	1	1	1	1	1	1	1	1	1	1	1	1	1	1	1	1	1	1	1	1	1	1	1	1	0	0		1
	Registration form	1	0	0	0	0	0	0	1	1	0	0	0	0	0	0	0	0								1	1	1	1	1	1	1	1	1	1	1	1	1	1	1	1	1	1	1	1	1	1		1
	Tea spoon	1	0	0	0	0	0	0	0	0	0	0	0	0	0	0	0	0	1	1	1	1	1	1	1	1	1	1	1	1	1	1	1	1	1	1	1	1	1	1	1	1	1	1	1	0	0		1
	HMIS Tools	1	1	0	1	1	1	1	1	1	1	1	1	1	1	1	1	1	1	1	1	1	1	1	1	1	1	1	1	1	1	1	1	1	1	1	1	1	1	1	1	1	1	1	1	1	1		1
	Labeling of the drugs	1	1	1	1	1	1	1	1	1	1	1	1	1	1	1	1	1	1	1	1	1	1	1	1	1	1	1	1	1	1	1	1	1	1	1	1	1	1	1	1	1	1	1	1	0	0		1
	Dust bin	1	0	0	0	0	0	0	0	0	0	0	0	0	0	0	0	0	1	1	1	1	1	1	1	1	1	1	1	1	1	1	1	1	1	1	1	1	1	1	1	1	1	1	1	0	0		1
Vaccination room	Refrigerator	1	1	0	1	1	1	1	1	0	1	1	1	1	1	1	1	1	1	1	1	1	1	1	1	0	0	0	0	0	0	0	0	0	1	1	1	0	0	0	1	1	0	0	0	1	0		0
	Vaccines	1	1	1	1	1	1	1	1	0	1	1	1	1	1	1	1	1	1	1	1	1	1	1	1	0	0	0	0	0	0	0	0	0	1	1	1	1	1	1	1	1	1	1	1	1	1		0
	Vaccination syringes	1	1	1	1	1	1	1	1	0	1	1	1	1	1	1	1	1	1	1	1	1	1	1	1	1	1	1	1	1	1	1	1	0	1	1	1	1	1	1	1	1	1	1	1	1	1		0
	Cold chain boxes	2	0	0	0	0	0	1	1	0	0	0	0	0	0	0	0	0	2	2	2	2	2	2	2	0	0	0	0	0	0	0	0	0	2	2	2	2	2	2	2	2	2	2	2	2	2		0
	Safety box	2	1	1	1	1	1	1	1	1	1	1	1	1	1	1	1	1	2	2	2	2	2	2	2	2	2	2	2	2	2	2	2	2	2	2	2	2	2	2	2	2	2	2	2	1	1		0
	Office chair	1	1	1	1	1	1	1	1	1	1	1	1	1	1	1	1	1	1	1	1	1	1	1	1	1	1	1	1	1	1	1	1	1	2	1	1	1	1	0	1	1	1	0	0	1	1		0
	Patient chair	3	1	1	1	1	1	1	1	1	1	1	1	1	1	1	1	1	3	3	3	3	3	3	3	3	3	3	3	3	3	3	3	3	2	2	2	2	1	0	3	2	2	0	0	3	1		0
	Office table	1	1	1	1	1	1	1	1	1	1	1	1	1	1	1	1	1	1	1	1	1	1	1	1	1	1	1	1	1	1	1	1	1	1	1	1	1	1	0	1	1	1	0	0	1	1		0
	Cupboard	1	1	1	1	1	1	1	1	1	1	1	1	1	1	1	1	1	1	1	1	1	1	1	1	1	1	1	1	1	1	1	1	1	1	1	1	1	1	0	1	1	1	0	0	1	0		0
	File box	3	1	1	1	1	1	1	1	1	1	1	1	1	1	1	1	1	3	3	3	3	3	3	3	3	3	3	3	3	3	3	3	3	2	3	3	3	3	3	3	3	3	3	3	0	0		0
	Sprit	2	1	0	1	1	1	1	0	1	1	1	1	1	1	1	1	1	2	2	2	2	2	2	2	2	2	2	2	2	2	2	2	2	2	2	2	2	2	2	2	2	2	2	2	1	0		0
	Cotton	10	0	1	0	1	0	0	1	0	1	0	0	0	0	0	0	0	2	10	10	10	10	10	10	10	10	10	10	10	10	10	10	10	2	10	10	10	10	10	10	7	9	5	5	1	0		0
	Child Health cards		0	0	0	0	0	0	1	0	0	0	0	0	0	0	0	0																	4														0
	HMIS Tools	1	1	0	1	1	1	1	1	1	1	1	1	1	1	1	1	1	1	1	1	1	1	1	1	1	1	1	1	1	1	1	1	1	1	1	1	1	1	1	1	1	1	1	1	1	1		0
	Dust bin	2	0	0	0	0	0	0	0	0	1	0	0	0	0	0	0	0	2	2	2	2	2	2	2	2	2	2	2	2	2	2	2	1		2	2	2	2	1	2	2	2	2	2	0	0		0
	IEC Materials	1	0	0	0	1	0	1	1	0	1	0	1	0	0	0	0	0	1	1	1	1	1	1	1	1	1	1	1	1	1	1	1	1		1	1	1	1	1	1	1	1	1	1	1	0		0
Community Health initiatives	CHWs	8	0	0	0	0	0	0	0	1	1	0	0	1	0	1	0	1																															0
	Lead Mothers	4	0	0	0	0	0	0	0	0	0	0	0	0	0	0	0	0																															0
	Mother Care Groups	4	0	0	0	0	0	0	0	0	0	0	0	0	0	0	0	0																															0
	CHW teaching aid	8	0	0	0	0	0	0	0	0	0	0	0	0	0	0	0	0																															0
	CHW referal booklet	8	0	0	0	0	0	0	0	0	0	0	0	0	0	0	0	0																															0
	CHW reporting book	8	0	0	0	0	0	0	0	0	0	0	0	0	0	0	0	0																															0
	Lead Mother Job aid	4	0	0	0	0	0	0	0	0	0	0	0	0	0	0	0	0																															0
	Lead Mother referal booklet	4	0	0	0	0	0	0	0	0	0	0	0	0	0	0	0	0																															0
	Lead Mother reporting book	4	0	0	0	0	0	0	0	0	0	0	0	0	0	0	0	0																															0
	HF outreach plan	1	0	0	0	0	0	0	0	0	0	0	0	0	0	0	0	0																															0
	HF catchment area	1	0	0	0	0	0	0	0	0	0	0	0	0	0	0	0	0																															0
	Community Midwives	4	0	0	0	0	0	0	0	0	0	0	0	0	0	0	0	0																															0
	Community Midwives repports	4	0	0	0	0	0	0	0	0	0	0	0	0	0	0	0	0																															0
Nutrition Services	Thermometers	4	0	0	1	0	0	1	1	1	1	1	1	1	1	0	0	1								4	4	4	4	4	4	4	4	4															0
	Salter scale (25 kg) (plus pants or plastic basin) or mother & child Electronic	1	0	0	1	1	0	1	1	1	1	1	1	1	1	0	1	1								1	1	1	1	1	1	1	1	1															0
	scale	1	0	0	1	1	0	0	1	1	1	1	1	1	1	0	1	1								1	1	1	1	1	1	1	1	1															0
	Height/Length board	3	0	0	2	1	0	1	1	1	1	1	1	1	1	0	1	1								3	3	3	3	3	3	3	3	3															0
	MUAC tapes (child)	1	0	0	1	1	0	1	1	1	1	1	1	1	1	0	1	1								1	1	1	1	1	1	1	1	1															0
	MUAC tapes (mother)	1	0	0	0	0	0	1	1	1	1	1	1	1	1	0	1	1								1	1	1	1	1	1	1	1	1															0
	Plastic matts (# 3) or Benches (# 6) in mothers waiting area	1	0	0	1	1	0	1	1	1	1	1	1	1	1	0	1	1								1	1	1	1	1	1	1	1	1															0
	Plastic matts in appetite test place	1	0	0	1	1	0	1	1	1	1	1	1	0	1	0	1	1								1	1	1	1	1	1	1	1	1															0
	Water container (# 3)	3	0	0	2	1	0	2	2	1	1	1	1	1	1	0	1	1								3	3	3	3	3	3	3	3	3															0
	Cups (# 15)	15	0	0	5	2	0	2	2	0	2	2	1	2	1	0	1	1								15	15	15	15	15	15	15	15	15															0
	Sugar	1	0	0	0	0	0	0	1	0	0	0	0	0	0	0	1	1								1	1	1	1	1	1	1	1	1															0
	Hand washing facility and water	1	1	0	1	1	0	1	1	1	1	1	1	1	1	0	1	1								1	1	1	1	1	1	1	1	1															0
	Amoxicillin	1	1	0	1	1	0	0	1	0	1	1	1	1	1	0	1	1								1	1	1	1	1	1	1	1	1															0
	Folic acid	1	0	0	1	1	0	1	1	1	0	0	0	1	1	0	1	1								1	1	1	1	1	1	1	1	1															0
	Vit A	1	0	0	0	0	0	0	0	0	0	0	0	0	0	0	0	0								1	1	1	1	1	1	1	1	1															0
	Measles vaccine	1	1	0	1	1	0	1	1	1	1	1	1	1	1	0	1	1								1	1	1	1	1	1	1	1	1															0
	Mebendazole	1	0	0	1	1	0	1	0	0	0	0	0	0	0	0	0	0								1	1	1	1	1	1	1	1	1															0
	Malaria diagnoses kit	1	1	0	1	1	0	1	1	1	1	1	1	1	1	0	1	1								1	1	1	1	1	1	1	1	1															0
	Urine analysis tool	1	0	0	0	0	0	0	0	0	0	0	0	1	0	0	0	0								1	1	1	1	1	1	1	1	1															0
	Stool analysis tool	1	0	0	0	0	0	0	0	0	0	0	0	1	0	0	0	0								1	1	1	1	1	1	1	1	1															0
	Water	1	1	0	1	1	0	0	1	0	1	1	1	1	1	0	1	1								1	1	1	1	1	1	1	1	1															0
	Latrine	1	1	0	1	1	0	0	1	0	1	1	1	1	1	0	1	1								1	1	1	1	1	1	1	1	1															0
	Soap	1	1	0	1	1	0	1	1	1	1	1	1	1	1	0	1	1								1	1	1	1	1	1	1	1	1															0
	Detergents	1	0	0	0	0	0	0	0	0	0	0	0	0	0	0	0	0								1	1	1	1	1	1	1	1	1															0
	Brooms	1	0	0	1	1	0	1	0	1	1	1	0	0	1	0	1	0								1	1	1	1	1	1	1	1	1															0
	Garbage /trash basket	1	0	0	1	1	0	0	0	0	1	1	0	0	0	0	0	0								1	1	1	1	1	1	1	1	1															0
	Incinerator	1	1	0	1	1	0	1	1	1	1	1	1	1	1	0	1	1								1	1	1	1	1	1	1	1	1															0
	Laminated sheet weight for height	1	0	0	1	0	0	1	0	1	1	0	1	1	0	0	1	1								1	1	1	1	1	1	1	1	1															0
	RUTF ration sheet	1	0	0	1	1	0	1	0	1	0	1	1	1	0	0	1	1								1	1	1	1	1	1	1	1	1															0
	Stationaries	1	0	0	1	1	0	1	0	1	0	1	0	0	0	0	1	1								1	1	1	1	1	1	1	1	1															0
	Child follow-up card (admission)	1	0	0	1	1	0	1	1	1	0	1	1	0	0	0	1	1								1	1	1	1	1	1	1	1	1															0
	Child registration book for out patient	1	0	0	1	1	0	1	1	1	0	1	1	0	0	0	1	0								1	1	1	1	1	1	1	1	1															0
	Health Education book	1	0	0	0	1	0	1	1	1	0	1	1	0	0	0	1	1								1	1	1	1	1	1	1	1	1															0
	Monitoring & supervision book (field monitoring visit)	1	0	0	0	0	0	0	1	0	0	1	0	0	0	0	1	1								1	1	1	1	1	1	1	1	1															0
	Referral card (child)	1	0	0	1	1	0	1	1	0	0	1	1	1	0	0	1	1								1	1	1	1	1	1	1	1	1															0
	Discharge card (child)	1	0	0	0	0	0	0	1	0	0	0	0	1	0	0	1	0								1	1	1	1	1	1	1	1	1															0
	Monthly report form 43	1	0	0	1	1	0	1	1	1	0	1	1	1	0	0	1	0								1	1	1	1	1	1	1	1	1															0
	Supply form	1	0	0	1	1	0	1	1	1	0	1	1	1	0	0	1	1								1	1	1	1	1	1	1	1	1															0
	Ration card (RUTF)	1	0	0	1	0	0	1	1	1	0	1	1	0	0	0	1	1								1	1	1	1	1	1	1	1	1															0
	Home visit sheets	1	0	0	1	1	0	1	1	0	0	1	0	1	1	0	0	0								1	1	1	1	1	1	1	1	1															0
	Map of catchment area	1	0	0	0	0	0	0	0	0	0	0	0	0	0	0	0	0								1	1	1	1	1	1	1	1	1															0
	Chart with target and admission per month	1	0	0	0	0	0	0	0	0	0	0	0	0	0	0	0	0								1	1	1	1	1	1	1	1	1															0
	Poster of Assessment and Classification of Children 6 to 59 months with Acute malnutrition	1	0	0	0	0	0	0	0	0	0	0	0	0	0	0	0	0								1	1	1	1	1	1	1	1	1															0
	Flow up chart for Assessment and Action for children between 6 to 59 months	1	0	0	0	0	0	0	0	1	0	0	1	0	0	0	1	1								1	1	1	1	1	1	1	1	1															0
	Basic messages for management of acute malnutrition	1	0	0	1	0	0	0	0	0	0	1	0	0	0	0	0	0								1	1	1	1	1	1	1	1	1															0
	Ready to use therapeutic food (RUTF)	1	0	0	1	0	0	1	1	1	0	1	0	1	1	0	1	1								1	1	1	1	1	1	1	1	1															0
	Ready to use supplementary food (RUSF	1	0	0	1	0	0	1	1	1	0	0	0	1	1	0	1	1								1	1	1	1	1	1	1	1	1															0
Total Functionality		575	80	67	156	110	83	119	126	93	102	98	95	105	95	77	107	123	324	332	334	332	333	326	325	490	489	489	489	505	503	502	501	476	397	401	394	402	379	384	388	396	393	371	367	114	101	0	159
Percentage Functionality			13.913	11.6522	27.1304	19.1304	14.4348	20.6957	21.913	16.1739	17.7391	17.0435	16.5217	18.2609	16.5217	13.3913	18.6087	21.3913	72.809	74.6067	75.0562	74.6067	74.8315	73.2584	73.0337	85.2174	85.0435	85.0435	85.0435	87.8261	87.4783	87.3043	87.1304	82.7826	87.2527	88.1319	86.5934	88.3516	83.2967	84.3956	85.2747	87.033	86.3736	81.5385	80.6593	25.0549	22.1978	0	27.6522
Minimuim Recommended Functionality			75	75	75	75	75	75	75	75	75	75	75	75	75	75	75	75	75	75	75	75	75	75	75	75	75	75	75	75	75	75	75	75	75	75	75	75	75	75	75	75	75	75	75	75	75	75	75
Gap to attian minimum			61.087	63.3478	47.8696	55.8696	60.5652	54.3043	53.087	58.8261	57.2609	57.9565	58.4783	56.7391	58.4783	61.6087	56.3913	53.6087	2.19101	0.393258	-0.0561798	0.393258	0.168539	1.74157	1.96629	-10.2174	-10.0435	-10.0435	-10.0435	-12.8261	-12.4783	-12.3043	-12.1304	-7.78261	-12.2527	-13.1319	-11.5934	-13.3516	-8.2967	-9.3956	-10.2747	-12.033	-11.3736	-6.53846	-5.65934	49.9451	52.8022	75	47.3478
																		18.9681							74.0289									85.8744											85.3546			23.6264
[truncated: 4 more columns]

## Sheet: Staffing Norms 
			ECHO PROJECT SITES											GAC PROJECT SITES
		Reqiurements	Alradoum	Almashaga	Otash 13	Otash4	Sanidalaba	Umgoia	karakada	Maramusa	Towal	SC Mershing	SC Rehaid alberde	Kowaria	buram	AVERAGE
PHU	Medical Doctor	1	1	0	0	0		0	1	0	0	1	1	0	1	0.121951
	Specailist Physicians(Please specify) family medicine specialist	1	0	0	0	0	0	0	0	0	0			0	1	0.0243902
	Medical Assistant	3	2	2	2	2	1	1	1	1	1			1	1	0.365854
																0
	Pharmacy assistant	2	0	0	0	0	0	0	0	0	0			0	1	0.0243902
	Midwife	4	2	2	2	2	1	1	1	1	1			3	5	0.512195
	Health visitors	1	0	0	0	0	0	0	0	0	0			0	0	0
	EPI technicians	1	1	1	1	1	1	1	1	1	1			0	1	0.243902
	Nurses	4	4	3	2	2	2	2	2	2	2	3	3	1	28	1.36585
	Lab technician	1	1	0	1	1	1	0	1	1	1			0	2	0.219512
	Lab Assistant	1	0	0	0	0	0	0	0	0	0			0	2	0.0487805
	Health promoters	1	0	0	0	0	0	0	0	0	0			0	0	0
	Nutrition assistant	1	0	0	0	0	0	0	0	0	0	3	3	0	1	0.170732
	Community health workers	1	0	0	0	0	0	0	0	0	0			1	1	0.0487805
	Pharmacist	1	0	0	0	0	0	0	0	0	0			0	0	0
	Radio-technican	1	0	0	0	0	0	0	0	0	0			0	0	0
	Psychologist	1	0	0	0	0	0	0	0	0	0			0	0	0
	Dentist	1	0	0	0	0	0	0	0	0	0			0	0	0
	Dentist technican	1	0	0	0	0	0	0	0	0	0			0	0	0
	Optimologist	1	0	0	0	0	0	0	0	0	0			0	0	0
	Storekeeper	1	0	0	0	0	0	0	0	0	0			0	0	0
	Cleaner	3	1	1	1	1	1	1	1	1	1			2	5	0.390244
	Volunteer	8	0	0	0	0	0	0	0	0	0			2	0	0.0487805
	Supervisor	1	1	0	0	0	0	0	0	0	0			1	1	0.0731707
																	3.65854	8.92326
	Medical Assistant	1	0	0	0	0	0	0	0	0	0			0	0	0
	Nutritionist	1	0	0	0	0	0	0	0	0	0			0	0	0
	Nutrition assistant	4	0	0	0	0	0	0	0	0	0			0	0	0
	Community health workers	1	2	2	3	3	0	1	0	1	0			0	0	0.631579
	Optimologist	1	0	0	0	0	0	0	0	0	0			0	0	0
	Storekeeper	1	0	0	0	0	0	0	0	0	0			0	0	0
	Cleaner	1	1	1	1	1	1	1	1	1	1	3	3	0	0	0.789474
	Volunteer	8	0	0	0	0	0	0	0	0	0			0	0	0
	Supervisor	1	0	0	0	0	0	0	0	0	0			0	0	0
																1.42105	7.47922
Total Functionality		60	16	12	13	13	8	8	9	9	8	10	10	11	50
Percentage Functionality			26.6667	20	21.6667	21.6667	13.3333	13.3333	15	15	13.3333	16.6667	16.6667	18.3333	83.3333		22.6923
Minimuim Recommended Functionality			75	75	75	75	75	75	75	75	75	75	75	75	75
Gap to attian minimum			55	53.3333	53.3333	61.6667	61.6667	60	60	61.6667	58.3333	58.3333	56.6667	56.6667	-8.33333
													17.5758		50.8333
