# Supplementary material for: Health Services Availability and Readiness Assessment in Sudan: A Comprehensive Evaluation of Health Facilities and System Preparedness in Four States
Source: Research Square preprint supplement (doi:10.21203/rs.3.rs-7818252/v1), 2025-11-26
Supplement: Supplementary file 10 [file South Kordofan SARA Tool for Sudan.xlsx]

## Sheet: SARA 
								UNICEF PROJECT SITES				SHF PROJECT SITES		GAC PROJECT SITES
			Abugebiha locality							Dellami locality	Abukarshola locality	Elleri Locality
Department	Item	reqiurement on site	Kunjara	Alrhmania	Darjam	Albetera	Alsesaban	Aldelebat	Jandeel	Kukaya	NoorElhuda	Darbatty	Kurondy	TALO	TIBSA	TOMRIA	AVE
Waiting shelter	Plastic table	2	2	2	1	2	1	2	2	1	2	1	0	0	0	0	1.14286
	Office chair	2	0	2	0	2	0	0	0	2	0	2	0	0	0	0	0.571429
	Plastic mates	5	0	0	0	0	0	0	0	0	0	0	0	0	0	0	0
	Plastic chairs	20	6	5	2	2	8	10	3	0	4	0	0	0	0	0	2.85714
	Patient benches	10	3	2	1	3	1	0	2	0	0	0	3	0	0	0	1.07143
	Water collar	1	1	1	1	1	2	0	1	0	1	0	0	0	0	0	0.571429
	Water cups	4	4	0	4	1	3	4	4	0	3	0	0	0	0	0	1.64286
	Board for advertisement	1	0	0	0	0	0	0	0	0	0	0	0	0	0	0	0
	Timer	1	0	0	0	0	0	0	0	0	0	0	0	0	0	0	0
	Thermometer	1	0	0	0	1	0	0	0	0	0	0	0	0	0	0	0.0714286
	Weight scale	1	2	1	1	2	1	1	1	1	1	0	0	0	0	0	0.785714
	MUAC tape	2	2	2	2	1	2	2	1	1	2	0	0	0	0	0	1.07143
	Manuals for health education	2	1	0	0	0	1	2	0	1	0	0	0	0	0	0	0.357143
	Dust bin different size and color	3	1	1	0	0	0	1	0	0	0	0	0	0	0	0	0.214286
	File box	1	1	1	0	1	1	0	0	0	0	0	0	0	0	0	0.285714
	Water tank	1	1	1	1	1	1	1	0	0	1	0	0	0	0	0	0.5
	HMIS Tools	1	1	1	1	1	0	1	1	0	1	0	0	0	0	0	0.5
	Sign board	1	1	1	0	1	1	1	0	0	1	0	0	0	0	0	0.428571
																	0	12.0714	20.46	59
Medical assistant	Office table	1	1	1	1	1	1	1	1	1	1	1	1	1	1	1	1
	Office chair	1	1	1	1	1	1	1	1	1	1	1	1	1	0	1	0.928571
	Patient chair	2	1	1	1	1	1	1	1	1	0	2	2	2	0	0	1
	Cupboard	1	1	1	0	1	1	1	1	1	1	1	1	1	0	0	0.785714
	Sphygmomanometer	1	0	1	0	1	0	1	1	1	1	1	1	1	1	1	0.785714
	Stethoscope	1	0	1	0	1	0	1	1	1	1	1	1	1	0	1	0.714286
	Thermometer	1	0	0	0	1	0	0	1	1	1	1	1	0	0	0	0.428571
	Respiratory timer	1	0	0	0	0	0	0	0	0	0	0	0	0	0	0	0
	Screen	1	1	1	0	1	0	1	1	0	1	1	1	0	0	0	0.571429
	Examination bed	1	1	1	0	1	0	1	1	0	1	1	1	0	0	0	0.571429
	Hand washing facility	1	1	0	0	0	0	0	1	0	1	1	0	0	0	0	0.285714
	Towels	2	0	0	0	0	0	0	0	1	0	1	0	0	0	0	0.142857
	Gloves (Box)	1	0	1	0	0	0	0	1	0	1	1	0	0	0	0	0.285714
	Soap	1	0	0	0	0	0	0	0	0	1	0	0	0	0	0	0.0714286
	Torch	1	0	0	0	1	0	0	0	0	1	0	0	0	0	0	0.142857
	Lab coat	2	0	0	0	1	0	0	1	0	1	1	1	0	0	0	0.357143
	Tongue depressor (Box)	1	0	0	0	1	0	1	0	0	0	1	0	0	0	0	0.214286
	Scale	1	0	1	0	0	0	0	0	0	1	1	1	1	0	0	0.357143
	Treatment protocols	1	0	0	0	0	0	1	1	0	1	0	0	0	0	0	0.214286
	File box	1	0	0	0	0	0	0	1	0	0	1	0	1	0	0	0.214286
	IEC Materials	1	0	1	0	1	0	0	1	0	1	0	0	0	0	0	0.285714
	HMIS Tools	1	0	1	0	1	0	1	0	0	1	0	0	1	1	1	0.5
	Prescription paper	1	0	0	0	0	0	0	0	0	0	0	0	0	0	0	0
	Office table	1	1	1	0	1	0	0	1	0	1	0	0	0	0	0	0.357143
																	0	10.2143	#DIV/0!	27
Midwife	Midwife protocols	1	0	0	0	0	0	0	0	0	0	0	0	0	0	0	0
	Office chair	1	0	1	0	1	0	1	0	0	1	0	0	0	0	0	0.285714
	Examination bed	1	0	1	0	1	1	1	0	0	1	0	0	0	0	0	0.357143
	Screen	2	0	1	0	1	0	1	0	0	1	0	0	0	0	0	0.285714
	Delivery bed	1	0	0	0	1	0	1	0	0	0	0	1	0	0	0	0.214286
	Delivery set	1	0	0	0	1	0	0	0	0	1	0	0	0	0	0	0.142857
	Trolley	1	0	0	0	1	0	0	0	0	0	0	0	0	0	0	0.0714286
	Ambo bag	1	0	1	0	0	1	1	0	0	0	0	0	0	0	0	0.214286
	Patient bed	2	0	0	0	0	0	0	0	0	1	0	0	0	0	0	0.0714286
	Mattresses	2	0	0	0	0	0	2	0	0	0	0	0	0	0	0	0.142857
	Bed sheets	2	0	0	0	0	0	0	0	0	0	0	0	0	0	0	0
	Cupboard	1	0	1	0	1	0	1	0	0	1	0	0	0	0	0	0.285714
	Drip stand	2	0	1	0	1	0	2	0	0	2	0	0	0	0	0	0.428571
	Kidney dish	2	0	1	0	0	0	0	0	0	2	0	0	0	0	0	0.214286
	Urine basin	2	0	0	0	0	0	0	0	0	0	0	0	0	0	0	0
	Plastic basin	3	0	0	0	0	0	1	0	0	2	0	0	0	0	0	0.214286
	Plastic buckets	6	0	0	0	0	0	0	0	0	0	0	0	0	0	0	0
	Plastic sheets	2	0	0	0	0	0	0	0	0	0	0	0	0	0	0	0
	Hand washing facility	1	0	0	0	0	0	0	0	0	0	0	0	0	0	0	0
	Clean delivery kits	1	0	0	0	0	0	0	0	0	0	0	0	0	0	0	0
	Lab coat	2	0	0	0	0	0	0	0	0	0	0	0	0	0	0	0
	Gloves (Box)	1	0	0	0	0	0	0	0	0	1	0	0	0	0	0	0.0714286
	Chlorhexidine	2	0	0	0	0	0	0	0	0	0	0	0	0	0	0	0
	Iodine	5	0	0	0	0	0	0	0	0	0	0	0	0	0	0	0
	Spirit	2	0	0	0	0	0	0	0	0	0	0	0	0	0	0	0
	Fefol	1	0	0	0	0	0	0	0	0	0	0	0	0	0	0	0
	Folic acid	1	0	0	0	0	0	0	0	0	0	0	0	0	0	0	0
	Catgut suture	12	0	0	0	0	0	0	0	0	0	0	0	0	0	0	0
	Sterile gauze	1	0	0	0	0	0	0	0	0	0	0	0	0	0	0	0
	Cotton wool	10	0	0	0	0	0	0	0	0	1	0	0	0	0	0	0.0714286
	Sphygmomanometer	1	1	1	0	0	0	0	0	0	1	0	0	0	0	0	0.214286
	Stethoscope	1	1	1	0	0	0	1	0	0	1	0	0	0	0	0	0.285714
	Fetoscope	1	1	1	0	1	0	0	0	0	1	0	0	0	0	0	0.285714
	Baby scale	1	0	0	0	1	0	0	0	0	0	0	0	0	0	0	0.0714286
	Baby bed	1	0	0	0	0	0	0	0	0	0	0	0	0	0	0	0
	Patient chair	2	0	0	0	1	0	1	0	0	1	0	0	0	0	0	0.214286
	Soap	1	0	0	0	0	0	0	0	0	0	0	0	0	0	0	0
	Cazerameel	2	0	0	0	0	0	0	0	0	1	0	0	0	0	0	0.0714286
	Urine catheter	5	0	0	0	0	0	0	0	0	1	0	0	0	0	0	0.0714286
	Urinary metallic catheter	2	0	0	0	0	0	0	0	0	0	0	0	0	0	0	0
	Canula	10	0	0	0	0	0	0	0	0	0	0	0	0	0	0	0
	Lidocaine	5	0	0	0	0	0	0	0	0	0	0	0	0	0	0	0
	Adult scale	1	0	0	0	0	0	0	0	0	1	0	0	0	0	0	0.0714286
	Towels	2	0	0	0	0	0	0	0	0	0	0	0	0	0	0	0
	Mosquito nets	1	0	0	0	0	0	0	0	0	0	0	0	0	0	0	0
	Sucker	1	0	0	0	0	0	0	0	0	0	0	0	0	0	0	0
	Safety box	2	0	0	0	1	0	0	0	0	0	0	0	0	0	0	0.0714286
	File box	2	0	0	0	0	0	0	0	0	0	0	0	0	0	0	0
	HMIS Tools	1	1	1	0	1	0	1	0	0	1	0	0	0	0	0	0.357143
	IEC materials protocols	1	0	0	0	1	0	0	0	0	1	0	0	0	0	0	0.142857
	Dust bin	2	1	0	0	0	0	1	0	0	0	0	0	0	0	0	0.142857
																	0	5.07143	4.33455	117
Nursing room	Autoclave	1	0	0	0	0	0	0	0	0	1	0	0	0	0	0	0.0714286
	Stove	1	0	1	0	0	0	0	0	0	0	0	0	0	0	0	0.0714286
	Gas cylinder	1	0	0	0	0	0	0	0	0	0	0	0	0	0	0	0
	Cupboard	1	0	0	0	0	0	0	0	0	1	0	0	0	0	0	0.0714286
	Patient bed	4	0	0	0	0	0	0	0	0	0	0	0	0	0	0	0
	Drip stand	2	0	0	0	0	0	0	0	0	0	0	0	0	0	0	0
	Plastic table	1	0	0	0	0	0	0	0	0	0	0	0	1	1	1	0.214286
	Plastic chair	3	0	0	0	0	0	0	0	0	0	0	0	0	0	0	0
	Dressing set	2	0	0	0	0	0	0	0	0	1	0	0	0	0	0	0.0714286
	Cazerameel	2	0	0	0	0	0	0	0	0	0	0	0	0	0	0	0
	Lidocaine	5	0	0	0	0	0	0	0	0	0	0	0	0	0	0	0
	Lab coat	2	0	0	0	0	0	0	0	0	0	0	0	0	0	0	0
	Gloves	1	0	0	0	0	0	0	0	0	0	0	0	0	0	0	0
	Chlorhexidine	3	0	0	0	0	0	0	0	0	0	0	0	0	0	0	0
	Iodine	5	0	0	0	0	0	0	0	0	0	0	0	0	0	0	0
	Spirit	2	0	0	0	0	0	0	0	0	0	0	0	0	0	0	0
	Catgut suture	12	0	0	0	0	0	0	0	0	0	0	0	0	0	0	0
	Mattresses	4	0	0	0	0	0	0	0	0	0	0	0	0	0	0	0
	Bed sheets	4	0	0	0	0	0	0	0	0	0	0	0	0	0	0	0
	Gauze roll	1	0	0	0	0	0	0	0	0	0	0	0	0	0	0	0
	Gauze bandage	10	0	0	0	0	0	0	0	0	0	0	0	0	0	0	0
	Crept bandage	10	0	0	0	0	0	0	0	0	0	0	0	0	0	0	0
	Urine catheter	10	0	0	0	0	0	0	0	0	0	0	0	0	0	0	0
	Urinary bag	10	0	0	0	0	0	0	0	0	0	0	0	0	0	0	0
	Canula	10	0	0	0	0	0	0	0	0	0	0	0	0	0	0	0
	Safety box	2	0	0	0	0	0	0	0	0	0	0	0	0	0	0	0
	File box	2	0	0	0	0	0	0	0	0	0	0	0	0	0	0	0
	HMIS Tools	1	0	0	0	0	0	0	0	0	0	0	0	0	0	0	0
	Dust bin	3	0	0	0	0	0	0	0	0	0	0	0	0	0	0	0
																	0	0.5	0.434783	115
Lab Department	Microscope	1	0	0	0	0	0	0	0	0	0	0	0	0	0	0	0
	Colorimeter	1	0	0	0	0	0	0	0	0	0	0	0	0	0	0	0
	Chair	1	0	0	0	0	0	0	0	0	0	0	0	0	0	0	0
	Lab table	2	0	0	0	0	0	0	0	0	0	0	0	0	0	0	0
	Cupboard	1	0	0	0	0	0	0	0	0	0	0	0	0	0	0	0
	Power	1	0	0	0	0	0	0	0	0	0	0	0	0	0	0	0
	Hand washing facility	1	0	0	0	0	0	0	0	0	0	0	0	0	0	0	0
	Electronic centrifuge	1	0	0	0	0	0	0	0	0	0	0	0	0	0	0	0
	Gluco-meter	1	0	0	0	0	0	0	0	0	0	0	0	0	0	0	0
	Haemometer	2	0	0	0	0	0	0	0	0	0	0	0	0	0	0	0
	Blood container (EDTA)	1	0	0	0	0	0	0	0	0	0	0	0	0	0	0	0
	Blood lancet	1	0	0	0	0	0	0	0	0	0	0	0	0	0	0	0
	ESR RACKS	1	0	0	0	0	0	0	0	0	0	0	0	0	0	0	0
	ESR tubes	12	0	0	0	0	0	0	0	0	0	0	0	0	0	0	0
	Urine container	1	0	0	0	1	0	0	0	0	0	0	0	0	0	0	0.0714286
	Stool container	1	0	0	0	1	0	0	0	0	0	0	0	0	0	0	0.0714286
	Urine strips	1	0	0	0	0	0	0	0	0	0	0	0	0	0	0	0
	HCG test strip	1	0	0	0	0	0	0	0	0	0	0	0	0	0	0	0
	Rapid test VDRL	1	0	0	0	0	0	0	0	0	0	0	0	0	0	0	0
	Rapid test Malaria	1	0	0	0	1	0	0	0	0	0	0	0	0	0	0	0.0714286
	Test tubes	12	0	0	0	0	0	0	0	0	0	0	0	0	0	0	0
	Slides	1	0	0	0	0	0	0	0	0	0	0	0	0	0	0	0
	Cover glass	1	0	0	0	0	0	0	0	0	0	0	0	0	0	0	0
	Oil emersion	1	0	0	0	0	0	0	0	0	0	0	0	0	0	0	0
	HCL solution	1	0	0	0	0	0	0	0	0	0	0	0	0	0	0	0
	Tube racks	2	0	0	0	0	0	0	0	0	0	0	0	0	0	0	0
	Patient chair	2	0	0	0	0	0	0	0	0	0	0	0	0	0	0	0
	Lab coat	2	0	0	0	0	0	0	0	0	0	0	0	0	0	0	0
	WBC chamber	2	0	0	0	1	0	0	0	0	1	0	0	0	0	0	0.142857
	Automatic pipette	2	0	0	0	0	0	0	0	0	0	0	0	0	0	0	0
	Safety box	2	0	0	0	0	0	0	0	0	0	0	0	0	0	0	0
	HMIS Tools	1	0	0	0	0	0	0	0	0	0	0	0	0	0	0	0
	File box	2	0	0	0	0	0	0	0	0	0	0	0	0	0	0	0
	Dust bin	2	0	0	0	0	0	0	0	0	0	0	0	0	0	0	0
																	0	0.357143	0.541126	66
Pharmacy	Shelves	1	0	1	0	1	0	0	0	0	0	0	0	0	0	0	0.142857
	Cupboard	2	2	1	0	1	0	0	0	0	0	0	0	0	0	0	0.285714
	Office chair	1	1	1	0	1	0	0	0	0	0	0	0	0	0	0	0.214286
	Office table	2	0	1	0	1	0	0	0	0	0	0	0	0	0	0	0.142857
	Box file	3	0	1	0	1	0	0	0	0	0	0	0	0	0	0	0.142857
	Lap coat	2	1	0	0	1	0	0	0	0	0	0	0	0	0	0	0.142857
	Marker pen	12	0	0	0	0	0	0	0	0	0	0	0	0	0	0	0
	Different type of drugs	1	0	1	0	1	0	0	0	0	0	0	0	0	0	0	0.142857
	Drugs bags	1	0	0	0	0	0	0	0	0	0	0	0	0	0	0	0
	Registration form	1	0	1	0	0	0	0	0	0	0	0	0	0	0	0	0.0714286
	Tea spoon	1	0	1	0	0	0	0	0	0	0	0	0	0	0	0	0.0714286
	HMIS Tools	1	1	1	0	0	0	0	0	0	0	0	0	0	0	0	0.142857
	Labeling of the drugs	1	0	1	0	0	0	0	0	0	0	0	0	0	0	0	0.0714286
	Dust bin	1	0	0	0	0	0	0	0	0	0	0	0	0	0	0	0
																	0	1.57143	30
Vaccination room	Refrigerator	1	0	0	0	1	0	0	0	0	0	0	0	0	0	0	0.0714286
	Vaccines	1	0	0	0	1	0	0	0	0	0	0	0	0	0	0	0.0714286
	Vaccination syringes	1	0	0	0	1	0	0	0	0	0	0	0	0	0	0	0.0714286
	Cold chain boxes	2	0	0	0	2	0	0	0	0	2	0	0	0	0	0	0.285714
	Safety box	2	0	0	0	2	0	0	0	0	0	0	0	0	0	0	0.142857
	Office chair	1	0	0	0	0	0	0	0	0	0	0	0	0	0	0	0
	Patient chair	3	0	0	0	0	0	0	0	0	0	0	0	0	0	0	0
	Office table	1	0	0	0	1	0	0	0	0	0	0	0	0	0	0	0.0714286
	Cupboard	1	0	0	0	1	0	0	0	0	0	0	0	0	0	0	0.0714286
	File box	3	0	0	0	1	0	0	0	0	0	0	0	0	0	0	0.0714286
	Sprit	2	0	0	0	0	0	0	0	0	0	0	0	0	0	0	0
	Cotton	10	0	0	0	0	0	0	0	0	0	0	0	0	0	0	0
	HMIS Tools	1	0	0	0	1	0	0	0	0	0	0	0	0	0	0	0.0714286
	Dust bin	2	0	0	0	0	0	0	0	0	0	0	0	0	0	0	0
	IEC Materials	1	0	0	0	1	0	0	0	0	0	0	0	0	0	0	0.0714286
																		1	3.125	32
Community Health initiatives	CHWs	8												0	0	0	0
	Lead Mothers	4												0	0	0	0
	Mother Care Groups	4												0	0	0	0
	CHW teaching aid	8												0	0	0	0
	CHW referal booklet	8												0	0	0	0
	CHW reporting book	8												0	0	0	0
	Lead Mother Job aid	4												0	0	0	0
	Lead Mother referal booklet	4												0	0	0	0
	Lead Mother reporting book	4												0	0	0	0
	HF outreach plan	1												0	0	0	0
	HF catchment area	1												0	0	0	0
	Community Midwives	4												0	0	0	0
	Community Midwives repports	4												0	0	0	0
																	0	0	0	62
Nutrition Services	Thermometers	4												0	0	0	0
	Salter scale (25 kg) (plus pants or plastic basin) or mother & child Electronic	1												0	0	0	0
	scale	1												0	0	0	0
	Height/Length board	3												0	0	0	0
	MUAC tapes (child)	1												0	0	0	0
	MUAC tapes (mother)	1												0	0	0	0
	Plastic matts (# 3) or Benches (# 6) in mothers waiting area	1												0	0	0	0
	Plastic matts in appetite test place	1												0	0	0	0
	Water container (# 3)	3												0	0	0	0
	Cups (# 15)	15												0	0	0	0
	Sugar	1												0	0	0	0
	Hand washing facility and water	1												0	0	0	0
	Amoxicillin	1												0	0	0	0
	Folic acid	1												0	0	0	0
	Vit A	1												0	0	0	0
	Measles vaccine	1												0	0	0	0
	Mebendazole	1												0	0	0	0
	Malaria diagnoses kit	1												0	0	0	0
	Urine analysis tool	1												0	0	0	0
	Stool analysis tool	1												0	0	0	0
	Water	1												0	0	0	0
	Latrine	1												0	0	0	0
	Soap	1												0	0	0	0
	Detergents	1												0	0	0	0
	Brooms	1												0	0	0	0
	Garbage /trash basket	1												0	0	0	0
	Incinerator	1												0	0	0	0
	Laminated sheet weight for height	1												0	0	0	0
	RUTF ration sheet	1												0	0	0	0
	Stationaries	1												0	0	0	0
	Child follow-up card (admission)	1												0	0	0	0
	Child registration book for out patient	1												0	0	0	0
	Health Education book	1												0	0	0	0
	Monitoring & supervision book (field monitoring visit)	1												0	0	0	0
	Referral card (child)	1												0	0	0	0
	Discharge card (child)	1												0	0	0	0
	Monthly report form 43	1												0	0	0	0
	Supply form	1												0	0	0	0
	Ration card (RUTF)	1												0	0	0	0
	Home visit sheets	1												0	0	0	0
	Map of catchment area	1												0	0	0	0
	Chart with target and admission per month	1												0	0	0	0
	Poster of Assessment and Classification of Children 6 to 59 months with Acute malnutrition	1												0	0	0	0
	Flow up chart for Assessment and Action for children between 6 to 59 months	1												0	0	0	0
	Basic messages for management of acute malnutrition	1												0	0	0	0
	Ready to use therapeutic food (RUTF)	1												0	0	0	0
	Ready to use supplementary food (RUSF	1												0	0	0	0
																		0	0	68
TOTAL FUNCTIONALITY		576	44	55	17	71	28	51	31	14	63	20	16	11	4	6
PERCENTAGE FUNCTIONALITY			10.5769	13.2212	4.08654	17.0673	6.73077	12.2596	7.45192	3.36538	15.1442	4.80769	3.84615	1.90972	0.694444	1.04167	7.30025
MINIMUM RECOMMENDED FUNCTIOALITY			75	75	75	75	75	75	75	75	75	75	75	75	75	75
GAP TO ATTAIN MRF			64.4231	61.7788	70.9135	57.9327	68.2692	62.7404	67.5481	71.6346	59.8558	70.1923	71.1538	73.0903	74.3056	73.9583	67.6997
											9.98932		4.32692			1.21528

## Sheet: GAC SN
			GAC
		Reqiurements	TALO PHU	TIBSA PHU	TOMRIA PHU
PHU	Medical Doctor	1	0	0	0	0
	Specailist Physicians(Please specify) family medicine specialist	1	0	0	0	0
	Medical Assistant	3	0	0	0	0
						0
	Pharmacy assistant	2	0	0	0	0
	Midwife	4	3	1	0	1.33333
	Health visitors	1	0	0	0	0
	EPI technicians	1	0	0	0	0
	Nurses	4	0	0	0	0
	Lab technician	1	0	0	0	0
	Lab Assistant	1	0	0	0	0
	Health promoters	1	0	0	0	0
	Nutrition assistant	1	0	0	0	0
	Community health workers	1	1	1	1	1
	Pharmacist	1	0	0	0	0
	Radio-technican	1	0	0	0	0
	Psychologist	1	0	0	0	0
	Dentist	1	0	0	0	0
	Dentist technican	1	0	0	0	0
	Optimologist	1	0	0	0	0
	Storekeeper	1	0	0	0	0
	Cleaner	3	0	0	0	0
	Volunteer	8	1	0	0	0.333333
	Supervisor	1	0	0	0	0
							2.66667	6.50407	41
Nutrition	Medical Assistant	1	0	0	0	0
	Nutritionist	1	0	0	0	0
	Nutrition assistant	4	0	0	0	0
	Community health workers	1	0	0	0	0
	Optimologist	1	0	0	0	0
	Storekeeper	1	0	0	0	0
	Cleaner	1	0	0	0	0
	Volunteer	8	0	0	0	0
	Supervisor	1	0	0	0	0
							0	0	19
Total Functionality		60	5	2	1
Percentage Functionality			8.33333	3.33333	1.66667			4.44444
Minimuim Recommended Functionality			75	75	75
Gap to attian minimum			71.6667	73.3333	73.3333
